# Supplementary material for: Genome-wide identification and expression analysis of the cucumber PYL gene family
Source: PeerJ. 2022 Jan 11;10:e12786. doi: 10.7717/peerj.12786 (PMC8759363; doi:10.7717/peerj.12786)
Supplement: Supplemental Information 3 [file peerj-10-12786-s003.xlsx]

## Sheet: Info
Model	#Param	BIC	AICc	lnL	Invariant	Gamma	Freq A	Freq R	Freq N	Freq D	Freq C	Freq Q	Freq E	Freq G	Freq H	Freq I	Freq L	Freq K	Freq M	Freq F	Freq P	Freq S	Freq T	Freq W	Freq Y	Freq V
JTT+G	178	27875	26520.8	-13080.3	n/a	0.69247	0.0769	0.0511	0.0425	0.0513	0.0203	0.0411	0.0618	0.0747	0.023	0.0526	0.0911	0.0595	0.0234	0.0405	0.0505	0.0682	0.0585	0.0143	0.0323	0.0664
JTT+G+I	179	27884.7	26522.8	-13080.3	1e-05	0.692992	0.0769	0.0511	0.0425	0.0513	0.0203	0.0411	0.0618	0.0747	0.023	0.0526	0.0911	0.0595	0.0234	0.0405	0.0505	0.0682	0.0585	0.0143	0.0323	0.0664
WAG+G	178	27935.3	26581	-13110.4	n/a	0.709298	0.0866279	0.043972	0.0390894	0.0570451	0.0193078	0.0367281	0.0580589	0.0832518	0.0244313	0.048466	0.086209	0.0620286	0.0195027	0.0384319	0.0457631	0.0695179	0.0610127	0.0143859	0.0352742	0.0708956
WAG+G+I	179	27944.4	26582.5	-13110.1	0.00740071	0.725228	0.0866279	0.043972	0.0390894	0.0570451	0.0193078	0.0367281	0.0580589	0.0832518	0.0244313	0.048466	0.086209	0.0620286	0.0195027	0.0384319	0.0457631	0.0695179	0.0610127	0.0143859	0.0352742	0.0708956
LG+G	178	27984.3	26630	-13134.9	n/a	0.655623	0.079066	0.055941	0.041977	0.053052	0.012937	0.040767	0.071586	0.057337	0.022355	0.062157	0.099081	0.0646	0.022951	0.042302	0.04404	0.061197	0.053287	0.012066	0.034155	0.069147
LG+G+I	179	27993.8	26631.9	-13134.8	0.00601468	0.665512	0.079066	0.055941	0.041977	0.053052	0.012937	0.040767	0.071586	0.057337	0.022355	0.062157	0.099081	0.0646	0.022951	0.042302	0.04404	0.061197	0.053287	0.012066	0.034155	0.069147
WAG+G+F	197	28116.6	26618.3	-13109.5	n/a	0.703532	0.0589624	0.0708992	0.036663	0.0585033	0.0231521	0.029514	0.0646029	0.0682757	0.0415164	0.047288	0.0772611	0.0398111	0.0116744	0.0312193	0.0439431	0.0826392	0.0619138	0.00760805	0.0236112	0.120942
WAG+G+I+F	198	28126.1	26620.1	-13109.4	0.00466624	0.711926	0.0589624	0.0708992	0.036663	0.0585033	0.0231521	0.029514	0.0646029	0.0682757	0.0415164	0.047288	0.0772611	0.0398111	0.0116744	0.0312193	0.0439431	0.0826392	0.0619138	0.00760805	0.0236112	0.120942
JTT+G+F	197	28139.7	26641.3	-13121.1	n/a	0.663913	0.0589624	0.0708992	0.036663	0.0585033	0.0231521	0.029514	0.0646029	0.0682757	0.0415164	0.047288	0.0772611	0.0398111	0.0116744	0.0312193	0.0439431	0.0826392	0.0619138	0.00760805	0.0236112	0.120942
JTT+G+I+F	198	28149.3	26643.4	-13121.1	1e-05	0.663855	0.0589624	0.0708992	0.036663	0.0585033	0.0231521	0.029514	0.0646029	0.0682757	0.0415164	0.047288	0.0772611	0.0398111	0.0116744	0.0312193	0.0439431	0.0826392	0.0619138	0.00760805	0.0236112	0.120942
Dayhoff+G	178	28175.4	26821.1	-13230.4	n/a	0.739105	0.0871	0.0409	0.0404	0.0469	0.0335	0.0383	0.0495	0.0886	0.0336	0.0369	0.0854	0.0805	0.0148	0.0398	0.0507	0.0696	0.0585	0.0105	0.0299	0.0647
Dayhoff+G+I	179	28184.3	26822.5	-13230.1	0.0063508	0.755075	0.0871	0.0409	0.0404	0.0469	0.0335	0.0383	0.0495	0.0886	0.0336	0.0369	0.0854	0.0805	0.0148	0.0398	0.0507	0.0696	0.0585	0.0105	0.0299	0.0647
LG+G+F	197	28196.5	26698.2	-13149.5	n/a	0.637547	0.0589624	0.0708992	0.036663	0.0585033	0.0231521	0.029514	0.0646029	0.0682757	0.0415164	0.047288	0.0772611	0.0398111	0.0116744	0.0312193	0.0439431	0.0826392	0.0619138	0.00760805	0.0236112	0.120942
LG+G+I+F	198	28206.2	26700.2	-13149.5	0.00116152	0.639761	0.0589624	0.0708992	0.036663	0.0585033	0.0231521	0.029514	0.0646029	0.0682757	0.0415164	0.047288	0.0772611	0.0398111	0.0116744	0.0312193	0.0439431	0.0826392	0.0619138	0.00760805	0.0236112	0.120942
rtREV+G	178	28316.8	26962.5	-13301.2	n/a	0.6911	0.0646	0.0453	0.0376	0.0422	0.0114	0.0606	0.0607	0.0639	0.0273	0.0679	0.1018	0.0751	0.015	0.0287	0.0681	0.0488	0.0622	0.0251	0.0318	0.0619
rtREV+G+I	179	28325.4	26963.6	-13300.6	0.0102897	0.713264	0.0646	0.0453	0.0376	0.0422	0.0114	0.0606	0.0607	0.0639	0.0273	0.0679	0.1018	0.0751	0.015	0.0287	0.0681	0.0488	0.0622	0.0251	0.0318	0.0619
Dayhoff+G+F	197	28360.4	26862	-13231.4	n/a	0.687728	0.0589624	0.0708992	0.036663	0.0585033	0.0231521	0.029514	0.0646029	0.0682757	0.0415164	0.047288	0.0772611	0.0398111	0.0116744	0.0312193	0.0439431	0.0826392	0.0619138	0.00760805	0.0236112	0.120942
rtREV+G+F	197	28364.8	26866.5	-13233.6	n/a	0.645237	0.0589624	0.0708992	0.036663	0.0585033	0.0231521	0.029514	0.0646029	0.0682757	0.0415164	0.047288	0.0772611	0.0398111	0.0116744	0.0312193	0.0439431	0.0826392	0.0619138	0.00760805	0.0236112	0.120942
Dayhoff+G+I+F	198	28369.5	26863.6	-13231.2	0.00581749	0.701446	0.0589624	0.0708992	0.036663	0.0585033	0.0231521	0.029514	0.0646029	0.0682757	0.0415164	0.047288	0.0772611	0.0398111	0.0116744	0.0312193	0.0439431	0.0826392	0.0619138	0.00760805	0.0236112	0.120942
rtREV+G+I+F	198	28373.9	26868	-13233.4	0.00711562	0.654932	0.0589624	0.0708992	0.036663	0.0585033	0.0231521	0.029514	0.0646029	0.0682757	0.0415164	0.047288	0.0772611	0.0398111	0.0116744	0.0312193	0.0439431	0.0826392	0.0619138	0.00760805	0.0236112	0.120942
mtREV24+G+F	197	28699.7	27201.3	-13401.1	n/a	0.614407	0.0589624	0.0708992	0.036663	0.0585033	0.0231521	0.029514	0.0646029	0.0682757	0.0415164	0.047288	0.0772611	0.0398111	0.0116744	0.0312193	0.0439431	0.0826392	0.0619138	0.00760805	0.0236112	0.120942
mtREV24+G+I+F	198	28709.3	27203.4	-13401.1	1e-05	0.6146	0.0589624	0.0708992	0.036663	0.0585033	0.0231521	0.029514	0.0646029	0.0682757	0.0415164	0.047288	0.0772611	0.0398111	0.0116744	0.0312193	0.0439431	0.0826392	0.0619138	0.00760805	0.0236112	0.120942
cpREV+G	178	28879.9	27525.6	-13582.7	n/a	0.45538	0.0756	0.0621	0.041	0.0371	0.0091	0.0382	0.0495	0.0838	0.0246	0.0806	0.1011	0.0504	0.022	0.0506	0.0431	0.0622	0.0543	0.0181	0.0307	0.066
cpREV+G+F	197	28917.5	27419.1	-13510	n/a	0.525972	0.0589624	0.0708992	0.036663	0.0585033	0.0231521	0.029514	0.0646029	0.0682757	0.0415164	0.047288	0.0772611	0.0398111	0.0116744	0.0312193	0.0439431	0.0826392	0.0619138	0.00760805	0.0236112	0.120942
cpREV+G+I	179	28982.7	27620.8	-13629.3	0.0290698	0.405215	0.0756	0.0621	0.041	0.0371	0.0091	0.0382	0.0495	0.0838	0.0246	0.0806	0.1011	0.0504	0.022	0.0506	0.0431	0.0622	0.0543	0.0181	0.0307	0.066
cpREV+G+I+F	198	29254.6	27748.7	-13673.7	0.0290698	1.00669	0.0589624	0.0708992	0.036663	0.0585033	0.0231521	0.029514	0.0646029	0.0682757	0.0415164	0.047288	0.0772611	0.0398111	0.0116744	0.0312193	0.0439431	0.0826392	0.0619138	0.00760805	0.0236112	0.120942
mtREV24+G	178	29591.5	28237.2	-13938.5	n/a	0.565476	0.072	0.019	0.039	0.019	0.006	0.025	0.024	0.056	0.028	0.087	0.168	0.023	0.053	0.06	0.055	0.072	0.088	0.029	0.033	0.044
mtREV24+G+I	179	29601.2	28239.3	-13938.5	1e-05	0.565856	0.072	0.019	0.039	0.019	0.006	0.025	0.024	0.056	0.028	0.087	0.168	0.023	0.053	0.06	0.055	0.072	0.088	0.029	0.033	0.044
WAG+I	178	29636.8	28282.5	-13961.1	0.0289588	n/a	0.0866279	0.043972	0.0390894	0.0570451	0.0193078	0.0367281	0.0580589	0.0832518	0.0244313	0.048466	0.086209	0.0620286	0.0195027	0.0384319	0.0457631	0.0695179	0.0610127	0.0143859	0.0352742	0.0708956
JTT+I	178	29664.2	28309.9	-13974.9	0.0285768	n/a	0.0769	0.0511	0.0425	0.0513	0.0203	0.0411	0.0618	0.0747	0.023	0.0526	0.0911	0.0595	0.0234	0.0405	0.0505	0.0682	0.0585	0.0143	0.0323	0.0664
WAG	177	29707.9	28361.2	-14001.5	n/a	n/a	0.0866279	0.043972	0.0390894	0.0570451	0.0193078	0.0367281	0.0580589	0.0832518	0.0244313	0.048466	0.086209	0.0620286	0.0195027	0.0384319	0.0457631	0.0695179	0.0610127	0.0143859	0.0352742	0.0708956
JTT	177	29725.3	28378.5	-14010.2	n/a	n/a	0.0769	0.0511	0.0425	0.0513	0.0203	0.0411	0.0618	0.0747	0.023	0.0526	0.0911	0.0595	0.0234	0.0405	0.0505	0.0682	0.0585	0.0143	0.0323	0.0664
WAG+I+F	197	29783.3	28285	-13942.9	0.0289516	n/a	0.0589624	0.0708992	0.036663	0.0585033	0.0231521	0.029514	0.0646029	0.0682757	0.0415164	0.047288	0.0772611	0.0398111	0.0116744	0.0312193	0.0439431	0.0826392	0.0619138	0.00760805	0.0236112	0.120942
WAG+F	196	29854.8	28364	-13983.4	n/a	n/a	0.0589624	0.0708992	0.036663	0.0585033	0.0231521	0.029514	0.0646029	0.0682757	0.0415164	0.047288	0.0772611	0.0398111	0.0116744	0.0312193	0.0439431	0.0826392	0.0619138	0.00760805	0.0236112	0.120942
LG+I	178	29861.3	28507	-14073.4	0.0289834	n/a	0.079066	0.055941	0.041977	0.053052	0.012937	0.040767	0.071586	0.057337	0.022355	0.062157	0.099081	0.0646	0.022951	0.042302	0.04404	0.061197	0.053287	0.012066	0.034155	0.069147
JTT+I+F	197	29878.7	28380.3	-13990.6	0.0286914	n/a	0.0589624	0.0708992	0.036663	0.0585033	0.0231521	0.029514	0.0646029	0.0682757	0.0415164	0.047288	0.0772611	0.0398111	0.0116744	0.0312193	0.0439431	0.0826392	0.0619138	0.00760805	0.0236112	0.120942
Dayhoff+I	178	29935.4	28581.1	-14110.4	0.0265547	n/a	0.0871	0.0409	0.0404	0.0469	0.0335	0.0383	0.0495	0.0886	0.0336	0.0369	0.0854	0.0805	0.0148	0.0398	0.0507	0.0696	0.0585	0.0105	0.0299	0.0647
LG	177	29939	28592.2	-14117	n/a	n/a	0.079066	0.055941	0.041977	0.053052	0.012937	0.040767	0.071586	0.057337	0.022355	0.062157	0.099081	0.0646	0.022951	0.042302	0.04404	0.061197	0.053287	0.012066	0.034155	0.069147
JTT+F	196	29944.3	28453.5	-14028.2	n/a	n/a	0.0589624	0.0708992	0.036663	0.0585033	0.0231521	0.029514	0.0646029	0.0682757	0.0415164	0.047288	0.0772611	0.0398111	0.0116744	0.0312193	0.0439431	0.0826392	0.0619138	0.00760805	0.0236112	0.120942
Dayhoff	177	29994.6	28647.9	-14144.9	n/a	n/a	0.0871	0.0409	0.0404	0.0469	0.0335	0.0383	0.0495	0.0886	0.0336	0.0369	0.0854	0.0805	0.0148	0.0398	0.0507	0.0696	0.0585	0.0105	0.0299	0.0647
LG+I+F	197	30011	28512.7	-14056.8	0.0289612	n/a	0.0589624	0.0708992	0.036663	0.0585033	0.0231521	0.029514	0.0646029	0.0682757	0.0415164	0.047288	0.0772611	0.0398111	0.0116744	0.0312193	0.0439431	0.0826392	0.0619138	0.00760805	0.0236112	0.120942
LG+F	196	30088.8	28598	-14100.5	n/a	n/a	0.0589624	0.0708992	0.036663	0.0585033	0.0231521	0.029514	0.0646029	0.0682757	0.0415164	0.047288	0.0772611	0.0398111	0.0116744	0.0312193	0.0439431	0.0826392	0.0619138	0.00760805	0.0236112	0.120942
Dayhoff+I+F	197	30109.6	28611.3	-14106.1	0.0280014	n/a	0.0589624	0.0708992	0.036663	0.0585033	0.0231521	0.029514	0.0646029	0.0682757	0.0415164	0.047288	0.0772611	0.0398111	0.0116744	0.0312193	0.0439431	0.0826392	0.0619138	0.00760805	0.0236112	0.120942
Dayhoff+F	196	30173.2	28682.4	-14142.6	n/a	n/a	0.0589624	0.0708992	0.036663	0.0585033	0.0231521	0.029514	0.0646029	0.0682757	0.0415164	0.047288	0.0772611	0.0398111	0.0116744	0.0312193	0.0439431	0.0826392	0.0619138	0.00760805	0.0236112	0.120942
rtREV+I	178	30175.2	28820.9	-14230.4	0.0285837	n/a	0.0646	0.0453	0.0376	0.0422	0.0114	0.0606	0.0607	0.0639	0.0273	0.0679	0.1018	0.0751	0.015	0.0287	0.0681	0.0488	0.0622	0.0251	0.0318	0.0619
rtREV+I+F	197	30209.7	28711.4	-14156.1	0.028629	n/a	0.0589624	0.0708992	0.036663	0.0585033	0.0231521	0.029514	0.0646029	0.0682757	0.0415164	0.047288	0.0772611	0.0398111	0.0116744	0.0312193	0.0439431	0.0826392	0.0619138	0.00760805	0.0236112	0.120942
rtREV	177	30253.2	28906.5	-14274.1	n/a	n/a	0.0646	0.0453	0.0376	0.0422	0.0114	0.0606	0.0607	0.0639	0.0273	0.0679	0.1018	0.0751	0.015	0.0287	0.0681	0.0488	0.0622	0.0251	0.0318	0.0619
rtREV+F	196	30292.1	28801.3	-14202.1	n/a	n/a	0.0589624	0.0708992	0.036663	0.0585033	0.0231521	0.029514	0.0646029	0.0682757	0.0415164	0.047288	0.0772611	0.0398111	0.0116744	0.0312193	0.0439431	0.0826392	0.0619138	0.00760805	0.0236112	0.120942
cpREV	177	30599.2	29252.5	-14447.2	n/a	n/a	0.0756	0.0621	0.041	0.0371	0.0091	0.0382	0.0495	0.0838	0.0246	0.0806	0.1011	0.0504	0.022	0.0506	0.0431	0.0622	0.0543	0.0181	0.0307	0.066
cpREV+F	196	30711.5	29220.7	-14411.8	n/a	n/a	0.0589624	0.0708992	0.036663	0.0585033	0.0231521	0.029514	0.0646029	0.0682757	0.0415164	0.047288	0.0772611	0.0398111	0.0116744	0.0312193	0.0439431	0.0826392	0.0619138	0.00760805	0.0236112	0.120942
cpREV+I	178	30738.9	29384.6	-14512.2	0.0290698	n/a	0.0756	0.0621	0.041	0.0371	0.0091	0.0382	0.0495	0.0838	0.0246	0.0806	0.1011	0.0504	0.022	0.0506	0.0431	0.0622	0.0543	0.0181	0.0307	0.066
mtREV24+I+F	197	30797.4	29299	-14449.9	0.0255475	n/a	0.0589624	0.0708992	0.036663	0.0585033	0.0231521	0.029514	0.0646029	0.0682757	0.0415164	0.047288	0.0772611	0.0398111	0.0116744	0.0312193	0.0439431	0.0826392	0.0619138	0.00760805	0.0236112	0.120942
mtREV24+F	196	30856.5	29365.7	-14484.3	n/a	n/a	0.0589624	0.0708992	0.036663	0.0585033	0.0231521	0.029514	0.0646029	0.0682757	0.0415164	0.047288	0.0772611	0.0398111	0.0116744	0.0312193	0.0439431	0.0826392	0.0619138	0.00760805	0.0236112	0.120942
cpREV+I+F	197	30877.8	29379.5	-14490.2	0.0290698	n/a	0.0589624	0.0708992	0.036663	0.0585033	0.0231521	0.029514	0.0646029	0.0682757	0.0415164	0.047288	0.0772611	0.0398111	0.0116744	0.0312193	0.0439431	0.0826392	0.0619138	0.00760805	0.0236112	0.120942
mtREV24+I	178	32031.9	30677.6	-15158.7	0.0244945	n/a	0.072	0.019	0.039	0.019	0.006	0.025	0.024	0.056	0.028	0.087	0.168	0.023	0.053	0.06	0.055	0.072	0.088	0.029	0.033	0.044
mtREV24	177	32081.8	30735.1	-15188.4	n/a	n/a	0.072	0.019	0.039	0.019	0.006	0.025	0.024	0.056	0.028	0.087	0.168	0.023	0.053	0.06	0.055	0.072	0.088	0.029	0.033	0.044

## Sheet: Caption
Table. Maximum Likelihood fits of 56 different amino acid substitution models
NOTE.-- Models with the lowest BIC scores (Bayesian Information Criterion) are considered to describe the substitution pattern the best. For each model, AICc value (Akaike Information Criterion, corrected), Maximum Likelihood value (lnL), and the number of parameters (including branch lengths) are also presented [1]. Non-uniformity of evolutionary rates among sites may be modeled by using a discr…
Abbreviations: TR: General Time Reversible; JTT: Jones-Taylor-Thornton; rtREV: General Reverse Transcriptase; cpREV: General Reversible Chloroplast; mtREV24: General Reversible Mitochondrial./div>
1. Nei M. and Kumar S. (2000). Molecular Evolution and Phylogenetics. Oxford University Press, New York.
2. Kumar S., Stecher G., Li M., Knyaz C., and Tamura K. (2018). MEGA X: Molecular Evolutionary Genetics Analysis across computing platforms. Molecular Biology and Evolution 35:1547-1549.
Disclaimer: Although utmost care has been taken to ensure the correctness of the caption, the caption text is provided "as is" without any warranty of any kind. Authors advise the user to carefully check the caption prior to its use for any purpose and report any errors or problems to the authors immediately (www.megasoftware.net). In no event shall the authors and their employers be liable for a…

## Sheet: JTT+G
From\To	A	R	N	D	C	Q	E	G	H	I	L	K	M	F	P	S	T	W	Y	V
A	-	0.0014067	0.00123015	0.00219832	0.000603683	0.00118459	0.00341707	0.00673733	0.000261976	0.000985256	0.00146365	0.00113902	0.000569512	0.000290451	0.00513131	0.0137423	0.0138961	6.26464e-05	0.0002335	0.0100576
R	0.00211693	-	0.000994184	0.000411386	0.00107132	0.00642791	0.0010199	0.00526232	0.00382246	0.000651362	0.00175696	0.0201236	0.000522803	0.000137129	0.00185981	0.00353964	0.00197123	0.00093419	0.000394245	0.000591368
N	0.00222584	0.00119536	-	0.0147668	0.000329754	0.00163847	0.00185487	0.0029987	0.00480205	0.00133963	0.000649204	0.00781106	0.000401888	0.000154572	0.00031945	0.0179098	0.00714124	2.06096e-05	0.00117475	0.000566765
D	0.00329533	0.000409782	0.0122337	-	0.000110983	0.00110983	0.0248772	0.00492593	0.00122935	0.000315874	0.000290263	0.000870788	0.000230503	6.82971e-05	0.000332948	0.00208306	0.00128911	4.26857e-05	0.000759805	0.00108422
C	0.00228686	0.00269677	0.000690372	0.000280464	-	0.000194167	0.000172593	0.00211427	0.000862966	0.000409909	0.000776669	0.000151019	0.000496205	0.00142389	0.000323612	0.00761567	0.00142389	0.000819817	0.00353816	0.00213584
Q	0.00221641	0.00799188	0.00169428	0.00138526	9.59026e-05	-	0.0109435	0.00089509	0.00676646	0.000213117	0.00334593	0.00914271	0.000554104	9.59026e-05	0.00420906	0.00193936	0.00158772	0.00012787	0.000426234	0.000618039
E	0.00425199	0.000843311	0.0012756	0.0206505	5.66932e-05	0.00727799	-	0.00432286	0.000290553	0.000304726	0.000460632	0.00534333	0.0002126	9.21265e-05	0.000503152	0.00110552	0.0010063	8.50398e-05	0.0001063	0.00160158
G	0.00693575	0.00359979	0.00170609	0.00338287	0.000574559	0.00049248	0.00357634	-	0.000240377	0.000146571	0.00032832	0.000832525	0.000158297	0.000105531	0.000545245	0.00663088	0.000961508	0.000404537	8.79428e-05	0.00161815
H	0.00087591	0.00849252	0.00887335	0.00274198	0.000761661	0.0120914	0.000780702	0.000780702	-	0.00049508	0.00255156	0.00161853	0.000399872	0.000952076	0.00298952	0.00262773	0.00144716	9.52076e-05	0.00978734	0.000418913
I	0.00144042	0.000632787	0.0010824	0.000308067	0.000158197	0.000166523	0.000358024	0.000208154	0.00021648	-	0.0110238	0.000624461	0.0058616	0.00163192	0.00025811	0.0014321	0.00774331	9.99137e-05	0.000507895	0.0327883
L	0.0012355	0.000985519	0.000302867	0.000163452	0.000173067	0.00150953	0.000312482	0.000269215	0.000644193	0.00636501	-	0.000451896	0.00468242	0.0052545	0.00277868	0.00209603	0.000826874	0.000394208	0.000403822	0.00606214
K	0.00147212	0.0172827	0.00557933	0.00075078	5.15241e-05	0.00631538	0.00554988	0.0010452	0.00062565	0.000552044	0.000691895	-	0.000758141	5.15241e-05	0.000566765	0.00167821	0.00292951	6.62453e-05	0.000147212	0.000426914
M	0.0018716	0.00114168	0.000729925	0.000505333	0.000430469	0.000973233	0.000561481	0.000505333	0.000393037	0.0131761	0.0182294	0.00192775	-	0.000917085	0.000430469	0.00101067	0.0064196	0.000149728	0.000318172	0.0104623
F	0.000551499	0.000173019	0.000162206	8.65096e-05	0.000713704	9.73233e-05	0.000140578	0.000194647	0.000540685	0.00211949	0.0118194	7.56959e-05	0.000529871	-	0.000389293	0.00334143	0.000421734	0.000400107	0.00919165	0.00204379
P	0.00781381	0.00188191	0.000268844	0.000338223	0.000130086	0.00342559	0.000615739	0.000806531	0.00136156	0.000268844	0.00501263	0.000667773	0.000199465	0.000312206	-	0.00986916	0.00357302	5.20343e-05	0.000190792	0.00072848
S	0.0154954	0.00265213	0.0111608	0.00156688	0.00226683	0.00116874	0.00100177	0.00726286	0.000886185	0.00110452	0.00279983	0.00146413	0.000346768	0.00198428	0.00730781	-	0.0145	0.000231179	0.00105315	0.00140634
T	0.0182668	0.00172187	0.00518808	0.00113045	0.000494103	0.00111548	0.00106307	0.00122777	0.000568967	0.00696236	0.00128766	0.00297959	0.00256784	0.00029197	0.0030844	0.0169043	-	5.98913e-05	0.000336888	0.00393785
W	0.000336888	0.00333826	6.12524e-05	0.000153131	0.0011638	0.000367515	0.000367515	0.00211321	0.000153131	0.000367515	0.00251135	0.000275636	0.00024501	0.00113317	0.000183757	0.00110254	0.00024501	-	0.00125568	0.000826908
Y	0.000555918	0.000623713	0.00154572	0.00120675	0.00222367	0.000542359	0.000203385	0.000203385	0.00696931	0.000827098	0.00113895	0.00027118	0.000230503	0.0115251	0.000298298	0.00222367	0.000610154	0.000555918	-	0.000569477
V	0.011648	0.000455104	0.000362764	0.000837655	0.000652975	0.000382551	0.00149063	0.00182042	0.000145106	0.0259739	0.00831719	0.000382551	0.003687	0.00124659	0.000554039	0.00144446	0.00346934	0.000178084	0.00027702	-

## Sheet: JTT+G+I
From\To	A	R	N	D	C	Q	E	G	H	I	L	K	M	F	P	S	T	W	Y	V
A	-	0.0014067	0.00123015	0.00219832	0.000603683	0.00118459	0.00341707	0.00673733	0.000261976	0.000985256	0.00146365	0.00113902	0.000569512	0.000290451	0.00513131	0.0137423	0.0138961	6.26464e-05	0.0002335	0.0100576
R	0.00211693	-	0.000994184	0.000411386	0.00107132	0.00642791	0.0010199	0.00526232	0.00382246	0.000651362	0.00175696	0.0201236	0.000522803	0.000137129	0.00185981	0.00353964	0.00197123	0.00093419	0.000394245	0.000591368
N	0.00222584	0.00119536	-	0.0147668	0.000329754	0.00163847	0.00185487	0.0029987	0.00480205	0.00133963	0.000649204	0.00781106	0.000401888	0.000154572	0.00031945	0.0179098	0.00714124	2.06096e-05	0.00117475	0.000566765
D	0.00329533	0.000409782	0.0122337	-	0.000110983	0.00110983	0.0248772	0.00492593	0.00122935	0.000315874	0.000290263	0.000870788	0.000230503	6.82971e-05	0.000332948	0.00208306	0.00128911	4.26857e-05	0.000759805	0.00108422
C	0.00228686	0.00269677	0.000690372	0.000280464	-	0.000194167	0.000172593	0.00211427	0.000862966	0.000409909	0.000776669	0.000151019	0.000496205	0.00142389	0.000323612	0.00761567	0.00142389	0.000819817	0.00353816	0.00213584
Q	0.00221641	0.00799188	0.00169428	0.00138526	9.59026e-05	-	0.0109435	0.00089509	0.00676646	0.000213117	0.00334593	0.00914271	0.000554104	9.59026e-05	0.00420906	0.00193936	0.00158772	0.00012787	0.000426234	0.000618039
E	0.00425199	0.000843311	0.0012756	0.0206505	5.66932e-05	0.00727799	-	0.00432286	0.000290553	0.000304726	0.000460632	0.00534333	0.0002126	9.21265e-05	0.000503152	0.00110552	0.0010063	8.50398e-05	0.0001063	0.00160158
G	0.00693575	0.00359979	0.00170609	0.00338287	0.000574559	0.00049248	0.00357634	-	0.000240377	0.000146571	0.00032832	0.000832525	0.000158297	0.000105531	0.000545245	0.00663088	0.000961508	0.000404537	8.79428e-05	0.00161815
H	0.00087591	0.00849252	0.00887335	0.00274198	0.000761661	0.0120914	0.000780702	0.000780702	-	0.00049508	0.00255156	0.00161853	0.000399872	0.000952076	0.00298952	0.00262773	0.00144716	9.52076e-05	0.00978734	0.000418913
I	0.00144042	0.000632787	0.0010824	0.000308067	0.000158197	0.000166523	0.000358024	0.000208154	0.00021648	-	0.0110238	0.000624461	0.0058616	0.00163192	0.00025811	0.0014321	0.00774331	9.99137e-05	0.000507895	0.0327883
L	0.0012355	0.000985519	0.000302867	0.000163452	0.000173067	0.00150953	0.000312482	0.000269215	0.000644193	0.00636501	-	0.000451896	0.00468242	0.0052545	0.00277868	0.00209603	0.000826874	0.000394208	0.000403822	0.00606214
K	0.00147212	0.0172827	0.00557933	0.00075078	5.15241e-05	0.00631538	0.00554988	0.0010452	0.00062565	0.000552044	0.000691895	-	0.000758141	5.15241e-05	0.000566765	0.00167821	0.00292951	6.62453e-05	0.000147212	0.000426914
M	0.0018716	0.00114168	0.000729925	0.000505333	0.000430469	0.000973233	0.000561481	0.000505333	0.000393037	0.0131761	0.0182294	0.00192775	-	0.000917085	0.000430469	0.00101067	0.0064196	0.000149728	0.000318172	0.0104623
F	0.000551499	0.000173019	0.000162206	8.65096e-05	0.000713704	9.73233e-05	0.000140578	0.000194647	0.000540685	0.00211949	0.0118194	7.56959e-05	0.000529871	-	0.000389293	0.00334143	0.000421734	0.000400107	0.00919165	0.00204379
P	0.00781381	0.00188191	0.000268844	0.000338223	0.000130086	0.00342559	0.000615739	0.000806531	0.00136156	0.000268844	0.00501263	0.000667773	0.000199465	0.000312206	-	0.00986916	0.00357302	5.20343e-05	0.000190792	0.00072848
S	0.0154954	0.00265213	0.0111608	0.00156688	0.00226683	0.00116874	0.00100177	0.00726286	0.000886185	0.00110452	0.00279983	0.00146413	0.000346768	0.00198428	0.00730781	-	0.0145	0.000231179	0.00105315	0.00140634
T	0.0182668	0.00172187	0.00518808	0.00113045	0.000494103	0.00111548	0.00106307	0.00122777	0.000568967	0.00696236	0.00128766	0.00297959	0.00256784	0.00029197	0.0030844	0.0169043	-	5.98913e-05	0.000336888	0.00393785
W	0.000336888	0.00333826	6.12524e-05	0.000153131	0.0011638	0.000367515	0.000367515	0.00211321	0.000153131	0.000367515	0.00251135	0.000275636	0.00024501	0.00113317	0.000183757	0.00110254	0.00024501	-	0.00125568	0.000826908
Y	0.000555918	0.000623713	0.00154572	0.00120675	0.00222367	0.000542359	0.000203385	0.000203385	0.00696931	0.000827098	0.00113895	0.00027118	0.000230503	0.0115251	0.000298298	0.00222367	0.000610154	0.000555918	-	0.000569477
V	0.011648	0.000455104	0.000362764	0.000837655	0.000652975	0.000382551	0.00149063	0.00182042	0.000145106	0.0259739	0.00831719	0.000382551	0.003687	0.00124659	0.000554039	0.00144446	0.00346934	0.000178084	0.00027702	-

## Sheet: WAG+G
From\To	A	R	N	D	C	Q	E	G	H	I	L	K	M	F	P	S	T	W	Y	V
A	-	0.00129353	0.00106292	0.00224834	0.0010576	0.0017798	0.00490127	0.00629039	0.000412993	0.000499744	0.00182954	0.00299811	0.000929367	0.000431451	0.00351108	0.0124977	0.00690214	8.68013e-05	0.000452894	0.00758495
R	0.00254835	-	0.00132455	0.00044816	0.000543906	0.00594605	0.00135984	0.00259598	0.00278472	0.000483315	0.00228821	0.0177036	0.000710589	0.000210528	0.00165843	0.00453885	0.00180407	0.000893018	0.000717777	0.000952269
N	0.00235558	0.00149	-	0.0165185	0.000273148	0.00302374	0.00293298	0.00499761	0.00515507	0.00143262	0.000604743	0.00996434	0.000206179	0.000197104	0.000476135	0.014735	0.00660586	5.51781e-05	0.00204309	0.000742028
D	0.0034143	0.000345454	0.0113191	-	3.11962e-05	0.00120818	0.0191182	0.00384329	0.00121268	0.000101939	0.000389917	0.00158746	0.000107919	9.57837e-05	0.00103482	0.00397369	0.00121982	9.95638e-05	0.000612759	0.000575995
C	0.0047451	0.0012387	0.000552999	9.21696e-05	-	0.000193568	6.61161e-05	0.00136167	0.000324412	0.000439775	0.00176689	0.000244919	0.000406159	0.000815825	0.000267023	0.00521909	0.00166926	0.000550172	0.00102311	0.0037892
Q	0.00419788	0.0071188	0.00321814	0.00187651	0.000101758	-	0.0169361	0.00146547	0.00559525	0.00029446	0.00399776	0.0128851	0.0016073	0.000204808	0.00227809	0.00381467	0.00279172	0.000165524	0.00042839	0.00113918
E	0.00731303	0.0010299	0.00197469	0.0187844	2.19873e-05	0.0107138	-	0.00252073	0.000742746	0.000329298	0.000709275	0.00854982	0.000327775	0.000166301	0.00166543	0.00261365	0.00267729	0.000120118	0.000369304	0.00222606
G	0.00654549	0.00137114	0.00234654	0.00263347	0.000315798	0.000646518	0.00175793	-	0.000324983	7.87093e-05	0.000281864	0.00123581	0.00018109	0.000102344	0.000594483	0.00497498	0.000734865	0.00025855	0.00019491	0.000708002
H	0.00146438	0.005012	0.00824797	0.0028315	0.00025638	0.00841147	0.00176507	0.00110741	-	0.000357202	0.00229644	0.00294573	0.000420366	0.00139251	0.00169921	0.00274427	0.00154015	0.000201456	0.00728709	0.000447525
I	0.00089324	0.0004385	0.00115546	0.000119984	0.000175197	0.000223145	0.000394477	0.000135202	0.000180062	-	0.0145796	0.0010713	0.00442839	0.0021716	0.000243897	0.00118437	0.00474488	0.000163028	0.000790464	0.0295732
L	0.00183843	0.00116713	0.000274206	0.000258011	0.000395721	0.00170319	0.000477673	0.000272195	0.000650802	0.00819652	-	0.000852044	0.0050489	0.00433548	0.00101495	0.00127817	0.00106283	0.000510459	0.000749919	0.00680728
K	0.0041871	0.01255	0.00627936	0.00145992	7.62366e-05	0.00762948	0.00800265	0.00165864	0.00116024	0.000837061	0.00118419	-	0.000971785	0.000182088	0.00135922	0.00358576	0.00451326	0.000105501	0.000250709	0.00115488
M	0.0041281	0.00160214	0.000413246	0.000315663	0.0004021	0.00302691	0.000975776	0.000773023	0.000526598	0.0110049	0.0223179	0.00309077	-	0.00244044	0.000418164	0.00183122	0.00493349	0.000395676	0.000806017	0.00778323
F	0.000972518	0.000240876	0.000200476	0.000142173	0.000409862	0.000195729	0.00025123	0.000221699	0.000885225	0.00273858	0.00972519	0.000293887	0.00123843	-	0.000394037	0.00202411	0.000559376	0.00117362	0.0121424	0.00245731
P	0.00664634	0.00159352	0.0004067	0.00128994	0.000112659	0.00182832	0.0021129	0.00108148	0.000907151	0.000258302	0.00191198	0.00184232	0.000178207	0.000330913	-	0.00598145	0.0025882	0.000106959	0.000406447	0.00119062
S	0.0155736	0.00287095	0.00828537	0.00326074	0.00144954	0.00201539	0.00218283	0.00595783	0.000964445	0.000825708	0.00158505	0.00319946	0.000513734	0.001119	0.00393754	-	0.0142462	0.000401841	0.00148057	0.000880012
T	0.00979989	0.0013002	0.00423222	0.0011405	0.000528247	0.00168054	0.00254768	0.00100272	0.000616722	0.00376914	0.00150175	0.00458841	0.00157699	0.000352351	0.0019413	0.0162321	-	8.50604e-05	0.000547736	0.00524905
W	0.000522694	0.0027296	0.00014993	0.000394805	0.000738405	0.000422594	0.000484776	0.00149624	0.000342129	0.000549239	0.00305898	0.000454894	0.00053641	0.00313531	0.000340247	0.00194184	0.000360754	-	0.00467576	0.0013815
Y	0.00111224	0.000894764	0.00226407	0.000990948	0.000560013	0.000446047	0.000607849	0.000460013	0.00504712	0.00108608	0.00183278	0.000440864	0.000445638	0.0132294	0.000527305	0.00291788	0.000947402	0.00190692	-	0.00119003
V	0.00926811	0.000590631	0.000409129	0.000463466	0.00103196	0.000590161	0.001823	0.000831397	0.000154221	0.020217	0.00827765	0.00101044	0.00214109	0.00133209	0.000768547	0.000862911	0.00451733	0.000280329	0.0005921	-

## Sheet: WAG+G+I
From\To	A	R	N	D	C	Q	E	G	H	I	L	K	M	F	P	S	T	W	Y	V
A	-	0.00129353	0.00106292	0.00224834	0.0010576	0.0017798	0.00490127	0.00629039	0.000412993	0.000499744	0.00182954	0.00299811	0.000929367	0.000431451	0.00351108	0.0124977	0.00690214	8.68013e-05	0.000452894	0.00758495
R	0.00254835	-	0.00132455	0.00044816	0.000543906	0.00594605	0.00135984	0.00259598	0.00278472	0.000483315	0.00228821	0.0177036	0.000710589	0.000210528	0.00165843	0.00453885	0.00180407	0.000893018	0.000717777	0.000952269
N	0.00235558	0.00149	-	0.0165185	0.000273148	0.00302374	0.00293298	0.00499761	0.00515507	0.00143262	0.000604743	0.00996434	0.000206179	0.000197104	0.000476135	0.014735	0.00660586	5.51781e-05	0.00204309	0.000742028
D	0.0034143	0.000345454	0.0113191	-	3.11962e-05	0.00120818	0.0191182	0.00384329	0.00121268	0.000101939	0.000389917	0.00158746	0.000107919	9.57837e-05	0.00103482	0.00397369	0.00121982	9.95638e-05	0.000612759	0.000575995
C	0.0047451	0.0012387	0.000552999	9.21696e-05	-	0.000193568	6.61161e-05	0.00136167	0.000324412	0.000439775	0.00176689	0.000244919	0.000406159	0.000815825	0.000267023	0.00521909	0.00166926	0.000550172	0.00102311	0.0037892
Q	0.00419788	0.0071188	0.00321814	0.00187651	0.000101758	-	0.0169361	0.00146547	0.00559525	0.00029446	0.00399776	0.0128851	0.0016073	0.000204808	0.00227809	0.00381467	0.00279172	0.000165524	0.00042839	0.00113918
E	0.00731303	0.0010299	0.00197469	0.0187844	2.19873e-05	0.0107138	-	0.00252073	0.000742746	0.000329298	0.000709275	0.00854982	0.000327775	0.000166301	0.00166543	0.00261365	0.00267729	0.000120118	0.000369304	0.00222606
G	0.00654549	0.00137114	0.00234654	0.00263347	0.000315798	0.000646518	0.00175793	-	0.000324983	7.87093e-05	0.000281864	0.00123581	0.00018109	0.000102344	0.000594483	0.00497498	0.000734865	0.00025855	0.00019491	0.000708002
H	0.00146438	0.005012	0.00824797	0.0028315	0.00025638	0.00841147	0.00176507	0.00110741	-	0.000357202	0.00229644	0.00294573	0.000420366	0.00139251	0.00169921	0.00274427	0.00154015	0.000201456	0.00728709	0.000447525
I	0.00089324	0.0004385	0.00115546	0.000119984	0.000175197	0.000223145	0.000394477	0.000135202	0.000180062	-	0.0145796	0.0010713	0.00442839	0.0021716	0.000243897	0.00118437	0.00474488	0.000163028	0.000790464	0.0295732
L	0.00183843	0.00116713	0.000274206	0.000258011	0.000395721	0.00170319	0.000477673	0.000272195	0.000650802	0.00819652	-	0.000852044	0.0050489	0.00433548	0.00101495	0.00127817	0.00106283	0.000510459	0.000749919	0.00680728
K	0.0041871	0.01255	0.00627936	0.00145992	7.62366e-05	0.00762948	0.00800265	0.00165864	0.00116024	0.000837061	0.00118419	-	0.000971785	0.000182088	0.00135922	0.00358576	0.00451326	0.000105501	0.000250709	0.00115488
M	0.0041281	0.00160214	0.000413246	0.000315663	0.0004021	0.00302691	0.000975776	0.000773023	0.000526598	0.0110049	0.0223179	0.00309077	-	0.00244044	0.000418164	0.00183122	0.00493349	0.000395676	0.000806017	0.00778323
F	0.000972518	0.000240876	0.000200476	0.000142173	0.000409862	0.000195729	0.00025123	0.000221699	0.000885225	0.00273858	0.00972519	0.000293887	0.00123843	-	0.000394037	0.00202411	0.000559376	0.00117362	0.0121424	0.00245731
P	0.00664634	0.00159352	0.0004067	0.00128994	0.000112659	0.00182832	0.0021129	0.00108148	0.000907151	0.000258302	0.00191198	0.00184232	0.000178207	0.000330913	-	0.00598145	0.0025882	0.000106959	0.000406447	0.00119062
S	0.0155736	0.00287095	0.00828537	0.00326074	0.00144954	0.00201539	0.00218283	0.00595783	0.000964445	0.000825708	0.00158505	0.00319946	0.000513734	0.001119	0.00393754	-	0.0142462	0.000401841	0.00148057	0.000880012
T	0.00979989	0.0013002	0.00423222	0.0011405	0.000528247	0.00168054	0.00254768	0.00100272	0.000616722	0.00376914	0.00150175	0.00458841	0.00157699	0.000352351	0.0019413	0.0162321	-	8.50604e-05	0.000547736	0.00524905
W	0.000522694	0.0027296	0.00014993	0.000394805	0.000738405	0.000422594	0.000484776	0.00149624	0.000342129	0.000549239	0.00305898	0.000454894	0.00053641	0.00313531	0.000340247	0.00194184	0.000360754	-	0.00467576	0.0013815
Y	0.00111224	0.000894764	0.00226407	0.000990948	0.000560013	0.000446047	0.000607849	0.000460013	0.00504712	0.00108608	0.00183278	0.000440864	0.000445638	0.0132294	0.000527305	0.00291788	0.000947402	0.00190692	-	0.00119003
V	0.00926811	0.000590631	0.000409129	0.000463466	0.00103196	0.000590161	0.001823	0.000831397	0.000154221	0.020217	0.00827765	0.00101044	0.00214109	0.00133209	0.000768547	0.000862911	0.00451733	0.000280329	0.0005921	-

## Sheet: LG+G
From\To	A	R	N	D	C	Q	E	G	H	I	L	K	M	F	P	S	T	W	Y	V
A	-	0.0012077	0.000590135	0.00106464	0.00163538	0.00200807	0.00377571	0.00601616	0.00040742	0.000472971	0.00198931	0.0017602	0.00131017	0.00054504	0.00263396	0.0146919	0.00579001	0.000110741	0.000379807	0.00894738
R	0.00170694	-	0.00160289	0.00033397	0.000351211	0.00581349	0.00132324	0.00113621	0.00275498	0.000400874	0.00151888	0.0207545	0.000564302	0.000113266	0.000743751	0.0026671	0.00156688	0.000363754	0.000545428	0.000600106
N	0.00111155	0.00213611	-	0.0136767	0.000347411	0.00351088	0.00196944	0.00418632	0.00511945	0.00060452	0.000344321	0.00703754	0.00043244	0.000192332	0.000361856	0.0124578	0.00541432	2.78058e-05	0.00106162	0.000293888
D	0.00158668	0.000352157	0.0108216	-	4.11006e-05	0.00108362	0.0190645	0.00246036	0.00105258	3.37453e-05	7.58616e-05	0.000928328	2.97786e-05	3.74158e-05	0.000882249	0.00385473	0.00115248	1.83162e-05	0.000234357	0.000133329
C	0.00999481	0.00151867	0.00112725	0.000168545	-	0.000175586	1.27209e-05	0.00165766	0.000727224	0.00101213	0.00298901	4.35229e-05	0.00104167	0.00237447	0.000168601	0.00865405	0.00309453	0.000410645	0.00202173	0.00688046
Q	0.00389457	0.00797735	0.00361509	0.00141016	5.57206e-05	-	0.0150098	0.000780277	0.00546489	0.000229979	0.00293089	0.010611	0.00194953	7.70293e-05	0.00139631	0.00380361	0.00292311	0.000144739	0.000446375	0.000738625
E	0.00417023	0.00103405	0.00115485	0.0141286	2.29891e-06	0.00854783	-	0.00101582	0.000481242	0.000139732	0.000350591	0.00592896	0.000202504	4.04127e-05	0.00093806	0.00190199	0.00163604	4.77066e-05	0.000208216	0.000860488
G	0.0082961	0.00110855	0.00306484	0.00227649	0.000374019	0.000554782	0.00126826	-	0.000353635	2.74792e-05	0.000222719	0.000973199	0.000162645	0.000192463	0.000440527	0.00540782	0.000351368	0.000164527	9.48463e-05	0.000269352
H	0.00144098	0.00689404	0.00961302	0.00249793	0.00042085	0.00996588	0.00154105	0.000907018	-	0.000343709	0.00184329	0.00228757	0.000515742	0.00146548	0.00113811	0.00307692	0.00158115	0.000365866	0.00920524	0.000417939
I	0.000601636	0.000360785	0.000408256	2.88021e-05	0.000210659	0.000150837	0.000160929	2.53483e-05	0.000123616	-	0.0208577	0.000521871	0.00498129	0.00239053	0.000175085	0.000199236	0.00279755	6.84237e-05	0.000403335	0.0373966
L	0.00158746	0.000857559	0.000145876	4.06194e-05	0.000390275	0.00120592	0.000253302	0.000128885	0.000415889	0.0130848	-	0.000451108	0.00735764	0.00557003	0.000557053	0.000566541	0.000819818	0.000379702	0.00051977	0.00597955
K	0.00215437	0.0179725	0.00457299	0.000762378	8.71603e-06	0.00669628	0.00657013	0.000863782	0.000791621	0.000502136	0.000691892	-	0.000765333	5.13844e-05	0.000873003	0.00232688	0.00307663	3.05817e-05	0.000228849	0.000650376
M	0.00451352	0.00137544	0.000790925	6.88342e-05	0.000587166	0.00346289	0.000631627	0.000406324	0.000502349	0.0134906	0.0317634	0.00215418	-	0.00386458	0.000223324	0.00107834	0.0054676	0.000426606	0.000834874	0.00666775
F	0.00101873	0.000149785	0.000190854	4.69241e-05	0.000726173	7.42342e-05	6.83889e-05	0.000260868	0.000774449	0.00351256	0.0130463	7.84698e-05	0.00209673	-	0.00021128	0.00112452	0.000446533	0.00150569	0.0135367	0.00229906
P	0.00472881	0.000944736	0.000344906	0.00106279	4.95275e-05	0.00129254	0.00152479	0.000573536	0.000577711	0.000247111	0.00125326	0.00128056	0.000116383	0.000202942	-	0.00415886	0.00154653	5.82949e-05	0.000155443	0.00104123
S	0.0189818	0.00243803	0.00854522	0.00334168	0.00182946	0.00253381	0.00222488	0.00506672	0.00112398	0.000202361	0.000917258	0.00245627	0.000404414	0.000777316	0.0029929	-	0.0175156	0.000152499	0.000694789	0.000345443
T	0.00859108	0.00164492	0.00426515	0.0011474	0.00075129	0.00223631	0.00219787	0.000378073	0.000663327	0.00326322	0.00152436	0.0037298	0.00235492	0.000354481	0.00127816	0.0201156	-	8.62956e-05	0.000426436	0.00768418
W	0.000725662	0.00168645	9.67348e-05	8.05328e-05	0.000440288	0.000489026	0.000283037	0.000781826	0.00067785	0.000352479	0.00311795	0.000163731	0.000811457	0.00527877	0.000212772	0.000773453	0.000381107	-	0.00546714	0.000665504
Y	0.000879221	0.000893333	0.00130475	0.00036402	0.000765778	0.000532788	0.000436404	0.000159221	0.00602498	0.000734009	0.00150781	0.000432841	0.000561007	0.0167656	0.00020043	0.00124488	0.000665305	0.00193139	-	0.000875515
V	0.0102309	0.000485495	0.00017841	0.000102295	0.00128729	0.000435471	0.00089084	0.000223348	0.000135118	0.0336162	0.00856812	0.000607608	0.00221313	0.00140649	0.000663161	0.000305727	0.00592168	0.000116129	0.000432459	-

## Sheet: LG+G+I
From\To	A	R	N	D	C	Q	E	G	H	I	L	K	M	F	P	S	T	W	Y	V
A	-	0.0012077	0.000590135	0.00106464	0.00163538	0.00200807	0.00377571	0.00601616	0.00040742	0.000472971	0.00198931	0.0017602	0.00131017	0.00054504	0.00263396	0.0146919	0.00579001	0.000110741	0.000379807	0.00894738
R	0.00170694	-	0.00160289	0.00033397	0.000351211	0.00581349	0.00132324	0.00113621	0.00275498	0.000400874	0.00151888	0.0207545	0.000564302	0.000113266	0.000743751	0.0026671	0.00156688	0.000363754	0.000545428	0.000600106
N	0.00111155	0.00213611	-	0.0136767	0.000347411	0.00351088	0.00196944	0.00418632	0.00511945	0.00060452	0.000344321	0.00703754	0.00043244	0.000192332	0.000361856	0.0124578	0.00541432	2.78058e-05	0.00106162	0.000293888
D	0.00158668	0.000352157	0.0108216	-	4.11006e-05	0.00108362	0.0190645	0.00246036	0.00105258	3.37453e-05	7.58616e-05	0.000928328	2.97786e-05	3.74158e-05	0.000882249	0.00385473	0.00115248	1.83162e-05	0.000234357	0.000133329
C	0.00999481	0.00151867	0.00112725	0.000168545	-	0.000175586	1.27209e-05	0.00165766	0.000727224	0.00101213	0.00298901	4.35229e-05	0.00104167	0.00237447	0.000168601	0.00865405	0.00309453	0.000410645	0.00202173	0.00688046
Q	0.00389457	0.00797735	0.00361509	0.00141016	5.57206e-05	-	0.0150098	0.000780277	0.00546489	0.000229979	0.00293089	0.010611	0.00194953	7.70293e-05	0.00139631	0.00380361	0.00292311	0.000144739	0.000446375	0.000738625
E	0.00417023	0.00103405	0.00115485	0.0141286	2.29891e-06	0.00854783	-	0.00101582	0.000481242	0.000139732	0.000350591	0.00592896	0.000202504	4.04127e-05	0.00093806	0.00190199	0.00163604	4.77066e-05	0.000208216	0.000860488
G	0.0082961	0.00110855	0.00306484	0.00227649	0.000374019	0.000554782	0.00126826	-	0.000353635	2.74792e-05	0.000222719	0.000973199	0.000162645	0.000192463	0.000440527	0.00540782	0.000351368	0.000164527	9.48463e-05	0.000269352
H	0.00144098	0.00689404	0.00961302	0.00249793	0.00042085	0.00996588	0.00154105	0.000907018	-	0.000343709	0.00184329	0.00228757	0.000515742	0.00146548	0.00113811	0.00307692	0.00158115	0.000365866	0.00920524	0.000417939
I	0.000601636	0.000360785	0.000408256	2.88021e-05	0.000210659	0.000150837	0.000160929	2.53483e-05	0.000123616	-	0.0208577	0.000521871	0.00498129	0.00239053	0.000175085	0.000199236	0.00279755	6.84237e-05	0.000403335	0.0373966
L	0.00158746	0.000857559	0.000145876	4.06194e-05	0.000390275	0.00120592	0.000253302	0.000128885	0.000415889	0.0130848	-	0.000451108	0.00735764	0.00557003	0.000557053	0.000566541	0.000819818	0.000379702	0.00051977	0.00597955
K	0.00215437	0.0179725	0.00457299	0.000762378	8.71603e-06	0.00669628	0.00657013	0.000863782	0.000791621	0.000502136	0.000691892	-	0.000765333	5.13844e-05	0.000873003	0.00232688	0.00307663	3.05817e-05	0.000228849	0.000650376
M	0.00451352	0.00137544	0.000790925	6.88342e-05	0.000587166	0.00346289	0.000631627	0.000406324	0.000502349	0.0134906	0.0317634	0.00215418	-	0.00386458	0.000223324	0.00107834	0.0054676	0.000426606	0.000834874	0.00666775
F	0.00101873	0.000149785	0.000190854	4.69241e-05	0.000726173	7.42342e-05	6.83889e-05	0.000260868	0.000774449	0.00351256	0.0130463	7.84698e-05	0.00209673	-	0.00021128	0.00112452	0.000446533	0.00150569	0.0135367	0.00229906
P	0.00472881	0.000944736	0.000344906	0.00106279	4.95275e-05	0.00129254	0.00152479	0.000573536	0.000577711	0.000247111	0.00125326	0.00128056	0.000116383	0.000202942	-	0.00415886	0.00154653	5.82949e-05	0.000155443	0.00104123
S	0.0189818	0.00243803	0.00854522	0.00334168	0.00182946	0.00253381	0.00222488	0.00506672	0.00112398	0.000202361	0.000917258	0.00245627	0.000404414	0.000777316	0.0029929	-	0.0175156	0.000152499	0.000694789	0.000345443
T	0.00859108	0.00164492	0.00426515	0.0011474	0.00075129	0.00223631	0.00219787	0.000378073	0.000663327	0.00326322	0.00152436	0.0037298	0.00235492	0.000354481	0.00127816	0.0201156	-	8.62956e-05	0.000426436	0.00768418
W	0.000725662	0.00168645	9.67348e-05	8.05328e-05	0.000440288	0.000489026	0.000283037	0.000781826	0.00067785	0.000352479	0.00311795	0.000163731	0.000811457	0.00527877	0.000212772	0.000773453	0.000381107	-	0.00546714	0.000665504
Y	0.000879221	0.000893333	0.00130475	0.00036402	0.000765778	0.000532788	0.000436404	0.000159221	0.00602498	0.000734009	0.00150781	0.000432841	0.000561007	0.0167656	0.00020043	0.00124488	0.000665305	0.00193139	-	0.000875515
V	0.0102309	0.000485495	0.00017841	0.000102295	0.00128729	0.000435471	0.00089084	0.000223348	0.000135118	0.0336162	0.00856812	0.000607608	0.00221313	0.00140649	0.000663161	0.000305727	0.00592168	0.000116129	0.000432459	-

## Sheet: WAG+G+F
From\To	A	R	N	D	C	Q	E	G	H	I	L	K	M	F	P	S	T	W	Y	V
A	-	0.00205688	0.000983183	0.002274	0.00125067	0.00141048	0.00537846	0.00508764	0.000692121	0.00048087	0.00161703	0.00189769	0.000548649	0.000345644	0.00332492	0.0146516	0.00690744	4.52719e-05	0.000298967	0.0127607
R	0.00171058	-	0.00122519	0.000453274	0.000643202	0.00471221	0.00149224	0.00209961	0.00466681	0.000465061	0.00202241	0.0112057	0.000419494	0.000168658	0.0015705	0.0053211	0.00180546	0.000465761	0.000473823	0.00160208
N	0.00158118	0.00236929	-	0.0167071	0.000323014	0.0023963	0.00321854	0.00404205	0.0086392	0.00137852	0.000534497	0.00630706	0.000121717	0.000157904	0.000450891	0.0172745	0.00661093	2.87786e-05	0.0013487	0.00124837
D	0.00229184	0.000549316	0.01047	-	3.68915e-05	0.000957473	0.0209795	0.00310843	0.00203228	9.80891e-05	0.000344625	0.0010048	6.37099e-05	7.67341e-05	0.000979955	0.00465854	0.00122076	5.19283e-05	0.000404498	0.000969042
C	0.00318514	0.00196969	0.000511516	9.32215e-05	-	0.000153402	7.25532e-05	0.00110131	0.000543671	0.000423166	0.00156165	0.000155025	0.000239774	0.000653572	0.000252866	0.00611857	0.00167054	0.000286947	0.000675383	0.00637487
Q	0.00281782	0.0113198	0.00297673	0.00189793	0.000120335	-	0.018585	0.00118526	0.00937689	0.000283339	0.00353339	0.00815581	0.000948863	0.000164076	0.0021573	0.00447211	0.00279386	8.63305e-05	0.000282792	0.00191653
E	0.00490887	0.00163767	0.00182656	0.0189987	2.60013e-05	0.00849062	-	0.00203875	0.00124474	0.000316862	0.000626886	0.00541172	0.000193501	0.000133227	0.00157713	0.00306411	0.00267935	6.26487e-05	0.000243787	0.00374507
G	0.00439365	0.00218029	0.00217051	0.00266352	0.000373451	0.000512362	0.00192908	-	0.000544627	7.57366e-05	0.000249123	0.000782219	0.000106906	8.19897e-05	0.000562964	0.00583239	0.00073543	0.000134849	0.000128665	0.00119113
H	0.000982964	0.00796971	0.00762925	0.00286382	0.000303185	0.00666603	0.00193692	0.000895667	-	0.000343711	0.00202969	0.00186454	0.000248162	0.00111557	0.00160912	0.00321724	0.00154133	0.000105071	0.0048104	0.000752905
I	0.000599587	0.000697269	0.00106878	0.000121353	0.000207181	0.000176841	0.000432883	0.000109351	0.00030176	-	0.012886	0.000678095	0.00261428	0.00173971	0.000230966	0.00138849	0.00474853	8.50284e-05	0.000521806	0.0497533
L	0.00123405	0.00185588	0.000253637	0.000260956	0.000467964	0.00134977	0.000524179	0.00022015	0.00109066	0.00788695	-	0.000539313	0.0029806	0.00347323	0.000961141	0.00149845	0.00106365	0.000266234	0.000495041	0.0114524
K	0.00281059	0.0199561	0.00580831	0.00147658	9.01544e-05	0.00604631	0.00878179	0.0013415	0.0019444	0.000805447	0.00104664	-	0.00057369	0.000145874	0.00128715	0.00420375	0.00451673	5.50248e-05	0.0001655	0.00194294
M	0.00277098	0.0025476	0.000382246	0.000319265	0.000475508	0.00239881	0.00107078	0.000625218	0.000882508	0.0105893	0.0197255	0.00195635	-	0.00195508	0.000395993	0.00214682	0.00493728	0.000206368	0.000532073	0.0130943
F	0.000652802	0.000383023	0.000185438	0.000143796	0.000484687	0.000155114	0.00027569	0.000179309	0.00148352	0.00263515	0.00859552	0.00018602	0.000731103	-	0.000373146	0.00237296	0.000559806	0.000612109	0.00801553	0.00413413
P	0.00446135	0.0025339	0.000376191	0.00130466	0.000133226	0.00144894	0.00231861	0.000874694	0.00152026	0.000248547	0.00168989	0.00116612	0.000105204	0.000265101	-	0.00701233	0.00259018	5.57851e-05	0.000268306	0.00200308
S	0.0104538	0.00456516	0.00766384	0.00329795	0.00171417	0.00159718	0.00239535	0.00481867	0.00161628	0.000794523	0.00140093	0.00202514	0.000303281	0.000896451	0.00372878	-	0.0142571	0.000209584	0.000977361	0.00148051
T	0.00657816	0.00206748	0.00391474	0.00115351	0.000624684	0.00133182	0.00279572	0.000810998	0.00103354	0.00362679	0.00132731	0.00290429	0.000930969	0.000282275	0.00183837	0.0190296	-	4.4364e-05	0.000361575	0.00883088
W	0.000350858	0.00434041	0.000138683	0.000399311	0.000873209	0.000334903	0.000531974	0.00121015	0.000573362	0.000528495	0.00270365	0.000287931	0.000316668	0.00251176	0.000322207	0.00227651	0.000361031	-	0.00308659	0.00232421
Y	0.000746588	0.00142279	0.00209423	0.00100226	0.00066225	0.000353489	0.000667029	0.000372057	0.00845829	0.00104506	0.00161988	0.000279051	0.000263081	0.0105983	0.000499347	0.00342077	0.000948129	0.000994568	-	0.00200208
V	0.00622121	0.000939178	0.000378438	0.000468756	0.00122035	0.000467699	0.00200048	0.000672431	0.000258454	0.0194534	0.00731613	0.00063957	0.00126399	0.00106716	0.000727799	0.00101163	0.0045208	0.000146208	0.000390861	-

## Sheet: WAG+G+I+F
From\To	A	R	N	D	C	Q	E	G	H	I	L	K	M	F	P	S	T	W	Y	V
A	-	0.00205688	0.000983183	0.002274	0.00125067	0.00141048	0.00537846	0.00508764	0.000692121	0.00048087	0.00161703	0.00189769	0.000548649	0.000345644	0.00332492	0.0146516	0.00690744	4.52719e-05	0.000298967	0.0127607
R	0.00171058	-	0.00122519	0.000453274	0.000643202	0.00471221	0.00149224	0.00209961	0.00466681	0.000465061	0.00202241	0.0112057	0.000419494	0.000168658	0.0015705	0.0053211	0.00180546	0.000465761	0.000473823	0.00160208
N	0.00158118	0.00236929	-	0.0167071	0.000323014	0.0023963	0.00321854	0.00404205	0.0086392	0.00137852	0.000534497	0.00630706	0.000121717	0.000157904	0.000450891	0.0172745	0.00661093	2.87786e-05	0.0013487	0.00124837
D	0.00229184	0.000549316	0.01047	-	3.68915e-05	0.000957473	0.0209795	0.00310843	0.00203228	9.80891e-05	0.000344625	0.0010048	6.37099e-05	7.67341e-05	0.000979955	0.00465854	0.00122076	5.19283e-05	0.000404498	0.000969042
C	0.00318514	0.00196969	0.000511516	9.32215e-05	-	0.000153402	7.25532e-05	0.00110131	0.000543671	0.000423166	0.00156165	0.000155025	0.000239774	0.000653572	0.000252866	0.00611857	0.00167054	0.000286947	0.000675383	0.00637487
Q	0.00281782	0.0113198	0.00297673	0.00189793	0.000120335	-	0.018585	0.00118526	0.00937689	0.000283339	0.00353339	0.00815581	0.000948863	0.000164076	0.0021573	0.00447211	0.00279386	8.63305e-05	0.000282792	0.00191653
E	0.00490887	0.00163767	0.00182656	0.0189987	2.60013e-05	0.00849062	-	0.00203875	0.00124474	0.000316862	0.000626886	0.00541172	0.000193501	0.000133227	0.00157713	0.00306411	0.00267935	6.26487e-05	0.000243787	0.00374507
G	0.00439365	0.00218029	0.00217051	0.00266352	0.000373451	0.000512362	0.00192908	-	0.000544627	7.57366e-05	0.000249123	0.000782219	0.000106906	8.19897e-05	0.000562964	0.00583239	0.00073543	0.000134849	0.000128665	0.00119113
H	0.000982964	0.00796971	0.00762925	0.00286382	0.000303185	0.00666603	0.00193692	0.000895667	-	0.000343711	0.00202969	0.00186454	0.000248162	0.00111557	0.00160912	0.00321724	0.00154133	0.000105071	0.0048104	0.000752905
I	0.000599587	0.000697269	0.00106878	0.000121353	0.000207181	0.000176841	0.000432883	0.000109351	0.00030176	-	0.012886	0.000678095	0.00261428	0.00173971	0.000230966	0.00138849	0.00474853	8.50284e-05	0.000521806	0.0497533
L	0.00123405	0.00185588	0.000253637	0.000260956	0.000467964	0.00134977	0.000524179	0.00022015	0.00109066	0.00788695	-	0.000539313	0.0029806	0.00347323	0.000961141	0.00149845	0.00106365	0.000266234	0.000495041	0.0114524
K	0.00281059	0.0199561	0.00580831	0.00147658	9.01544e-05	0.00604631	0.00878179	0.0013415	0.0019444	0.000805447	0.00104664	-	0.00057369	0.000145874	0.00128715	0.00420375	0.00451673	5.50248e-05	0.0001655	0.00194294
M	0.00277098	0.0025476	0.000382246	0.000319265	0.000475508	0.00239881	0.00107078	0.000625218	0.000882508	0.0105893	0.0197255	0.00195635	-	0.00195508	0.000395993	0.00214682	0.00493728	0.000206368	0.000532073	0.0130943
F	0.000652802	0.000383023	0.000185438	0.000143796	0.000484687	0.000155114	0.00027569	0.000179309	0.00148352	0.00263515	0.00859552	0.00018602	0.000731103	-	0.000373146	0.00237296	0.000559806	0.000612109	0.00801553	0.00413413
P	0.00446135	0.0025339	0.000376191	0.00130466	0.000133226	0.00144894	0.00231861	0.000874694	0.00152026	0.000248547	0.00168989	0.00116612	0.000105204	0.000265101	-	0.00701233	0.00259018	5.57851e-05	0.000268306	0.00200308
S	0.0104538	0.00456516	0.00766384	0.00329795	0.00171417	0.00159718	0.00239535	0.00481867	0.00161628	0.000794523	0.00140093	0.00202514	0.000303281	0.000896451	0.00372878	-	0.0142571	0.000209584	0.000977361	0.00148051
T	0.00657816	0.00206748	0.00391474	0.00115351	0.000624684	0.00133182	0.00279572	0.000810998	0.00103354	0.00362679	0.00132731	0.00290429	0.000930969	0.000282275	0.00183837	0.0190296	-	4.4364e-05	0.000361575	0.00883088
W	0.000350858	0.00434041	0.000138683	0.000399311	0.000873209	0.000334903	0.000531974	0.00121015	0.000573362	0.000528495	0.00270365	0.000287931	0.000316668	0.00251176	0.000322207	0.00227651	0.000361031	-	0.00308659	0.00232421
Y	0.000746588	0.00142279	0.00209423	0.00100226	0.00066225	0.000353489	0.000667029	0.000372057	0.00845829	0.00104506	0.00161988	0.000279051	0.000263081	0.0105983	0.000499347	0.00342077	0.000948129	0.000994568	-	0.00200208
V	0.00622121	0.000939178	0.000378438	0.000468756	0.00122035	0.000467699	0.00200048	0.000672431	0.000258454	0.0194534	0.00731613	0.00063957	0.00126399	0.00106716	0.000727799	0.00101163	0.0045208	0.000146208	0.000390861	-

[truncated: 48 more sheets: JTT+G+F, JTT+G+I+F, Dayhoff+G, Dayhoff+G+I, LG+G+F, LG+G+I+F, rtREV+G, rtREV+G+I, Dayhoff+G+F, rtREV+G+F, Dayhoff+G+I+F, rtREV+G+I+F, mtREV24+G+F, mtREV24+G+I+F, cpREV+G, cpREV+G+F, cpREV+G+I, cpREV+G+I+F, mtREV24+G, mtREV24+G+I …]
