# Supplementary material for: Genome-wide identification and expression analysis of the cucumber PYL gene family
Source: PeerJ. 2022 Jan 11;10:e12786. doi: 10.7717/peerj.12786 (PMC8759363; doi:10.7717/peerj.12786)
Supplement: Supplemental Information 4 [file peerj-10-12786-s004.xlsx]

## Sheet: Sheet1
>CsPYL1 （CsaV3_2G030780.1）
MEQPSPPPPPSKWEGEVFAETTAADPHQIWPLLADGFCSVHKWLPFVDTCHYVEGVPGQPGLIRHCSTTDTTSSIKWAKERLNLIDPIAHTLTYEVLDNNMGFKSYVATMKLLQGSGGGCKFVWSFVADPIEGWPLEEFVKYLDSALHQMMKKMADFLQKSP
>CsPYL2 （CsaV3_2G030790.1）
MGGRIYLHTGLHDPSPMAAKWEGRVTETLTVATPDQIWPMIKDFFNFHKWFPTLANCYGLSGTNAEVGSVRFCSGFSIPSSDGSDGVVSWSKERLVGVDEEHRRICYEIVDSNIGFKSYVATMEVGSVSGGGCMIEWRFEVEAVEGLKLEDLVKKYEVGLRSMANRMEAAEQQTLNLLYLSMEQQSPPPPPSKWEGEVFAETTAADPHQIWPLLTDDFCSLHKWLPFVDTCHYVEGVPGQPGLVRHCAVTVTPSSIKWAKERLNLIDPIAHTLTYEILDNNMGFKSYVATMKLLQGSGGGCKFVWSFVADPIEGWPLEEFVKYLDSGLHQMVNKMADFLKKSPL
>CsPYL3 （CsaV3_3G001740.1）
MEKADGGELDGEASAASTEQQLQPNSNSEETYLTTHHLSALPSGLTQEEFDELKDLVAEFHIYKLTRGRCSSLLAQRVQAPSEAVWSIVRRFDQPQSYKHFIKSCTVSEGFTMKLGCTREVNVISGLPADTSTERLDIHDDERHVIGFSIIGGEHRLRNYRSVTSVHQLERDGQIWSVVLESYAVDVPPGNTEEDARLFADTVVRLNLQKLASVVEGMNRAEGRKRWRA
>CsPYL4 （CsaV3_3G008140.1)
MNDDDACGLMEAQYIRRHHRHHPNHNQCTSAVFKNVRAPVPLVWSLVRRFDQPQKYKPFVSRCVVKGDLGIGSVREVNVKSGLPATTSTERLELLDDEEHILGIRIVGGDHRLKNYSSIMTVHPKVIDGRPGTLVIESFVVDVPNGNTKDETCYFVKALIRCNLKSLADVSERMAVQGQTEPLEK
>CsPYL5 (CsaV3_3G022000.1)
MSGTAGFTSLERECIRRHHRHDPADNQCSSVLIKHIKAPVPLVWSLVRRFDQPQKYKPFISRCVVQGNLEIGSLREVDVKSGLPATTSTERLELLDDDKHILSIRIVGGDHRLRNYSSIISLHSEIIEGRPGTLVVESFVVDTPEGNTKDETCFVVETLIKCNLKSLADVSEGLAIQDWTEPIV
>CsPYL6 (CsaV3_3G033450.1)
MLSKPSVSSVLIDRFNGSDPIHCQKEAHKWSKVPESVAVYHTHAVGPNQTCSAVVQEITAPISTVWSVVRRFDNPQAYKHFVKSCHVVVGDGNVGTLREVHVISGLPAGCSTERLEILDDEHHILSFSMIGGDHRLANYRSITTLHQSSAEGGNKTVVVESYAVDTPPGNTKDETMVFVDTILRCNLQSLAQLAENLHKRNNQSPP
>CsPYL7 (CsaV3_3G049190.1)
MEKGEPSEIDHNATATATATATATGTAHHLTVPPGLTQHEFDNLKNLIFEFHTYELRPGQCSSLLSQLIRAPRDVVWSVVRRFDKPQTYKHFIKSCTVAEDFIMTVGCTRDVNVISGLPAATSTERLDILDDDRCVTGFSITGGEHRLRNYRSVTTVHEMERDGQIWTVVLESYIVDVPEGNTEEDTRLFADTVVKLNLQKLTSVTEGMVRAVDSASAAASGTTPSSKSSSN
>CsPYL8 (CsaV3_4G026530.1)
MGGDSISNHLSYINQAAKEKKRETPLTRKMPPNPPKSSAASHRITHSSTVPEFFKRQIQTRATAVPDAVARYHNHAVSMNQCCSAVVQEIDAPVSTVWSVVRRFDNPQAYKHFVKSCDVIVGDGNVGSLREVRVISGLPAANSTERLEILDDERHIISFSVVGGEHRLANYRSVTTLHPTGDGTIVVESYVVDIPPGNTEEDTCVFVDTIVRCNLQSLTQIAENLNRRSRAAPP
>CsPYL9 (CsaV3_4G035560.1)
MAAKKTSPLPGLEADEYQELQPLIQTYHKFEPSPNTTTSLITQRIDAPLDAVWPFVRSFDNPQKYKHFIKSCKMSAGDGGVGSIREVTVVSGLPASTSTERLEILDDEKHILSFRVVGGEHRLNNYRSVTSVNEFNKDSKVYTIVLESYIVDIPEGNTGEDTKMFVDTVIKLNLQKLAGVATASQHEHEHEHE
>CsPYL10 (CsaV3_5G000620.1)
MNGNSTGNGNGNVGGLSNAEWELIRRYHRNEPAENQCTSRLVKRIKAPVPLVWSLVRRFDQPQRYKPFVSRCVLKGNLEIGTLREVDVKSGLPATTSTERLELLDDDNHILSMRIVGGDHRLKNYSSIISLHPEIIDGRPGTLVIESFVVDVPEGNTKDETCYFVEALIKCNLKSLADVSERLAVQDRTEPLDRI
>CsPYL11 (CsaV3_5G008890.1)
MFGLLSEIIWSRGTGMSMAYQGKSGKWQGSVGGLVDAPIDKVWPVVTQSKRLQEWMPMVERCTDVAGDEGVPGYERVVSGFMFPLKDGERSWIREKLLSMDPSAHCYSYKLEASNVGLDGSINTLKLVDYGEDSTLIEWKFEINPLEGVCEESIIDYLGFLYKSCINRIEGAIKAAAKS
>CsPYL12 (CsaV3_5G010560.1)
MPTSIQLHRLNPTANPGGGVAATTMNCHRSAAAAALAVTREKRTISNSTSTSMASLTDAAPVPVPDAVARHHAHDVGPEQCCSAVIQIIDAPVHTVWSVVRRFDNPQAYKHFLKSCDVIDGDGTVGSLRQVQVVSGLPAASSTERLEILDDERHVLSFRVVGGDHRLRNYRSVTTLHAISSSSSSSSSSNQNGSRSSTVVVESYAVDVPQGNTKEETCVFVDTIVRCNLQSLAQIAENMAKTS
>CsPYL13 (CsaV3_6G001990.1)
MPSSLQFYRYTATTPTPALNPKNHKHGVASEQCSSVVVQTIDAPVAVVWSLVRRFDNPQTYKHFLKSCRVVEGDGETVGTVREVEVVSGLPAVSSKERLEILDDEKHVMSFSVVGGDHRLNNYRSVTSLHVAPGGRGTVVVESYVVDVPPGNTKEETCVFVNTIVRCNLQWLARVSENIAKAKMKSIVILDVKSDGIFNWVFDFMEIA
>CsPYL14 (CsaV3_7G025250.1)
MGKRVFKAWECECECECVALSFLCSNLLFIAFHPTTPYPSKTHFLLLLLLLQPKSMDSQYIQRHHNHNPTHNQCSSAIFKHIKAPVHLVWSLVRSFDRPQRYKPFVSRCVVRGNSLGIGSLREVDVKSGLPATTSTERLELLDDEEHILGVKIVGGDHRLRNYSSIITVHPEAIDGRPGTLVVESFIVDVPEGNTKEETCFFVHSLINCNLKSLADVCERMAVMQDAVEPIHPYQV
>BdPYRL1(BRADI3G34070)
MEPQQQPDAAAAAGAGAGEPEVPAGLGLTAAEYAQLRPTVEAYHLYAVGQGQCSSLLAQR IEAPAAAVWAIVRRFDCPQVYKHFIRNCALRPDPNAGAGEDDGELRPGRLREVSVISGLP ASTSTERLDLLDDARRAFGFTIIGGEHRLRNYRSVTTVSEIRAAGAAAVVLESYIVDVPE GNSEEDTRLFADTVVRLNLQKLKSVAEANAASNAPAPPPAE
>BdPYRL2(BRADI1G37810)
MEAHMERALREGLTEAERASLEGAVRAHHTFPGRAATCTSLVAQRVAAPVRDVWPIVRSF GNPQRYKHFVRTCALAAGDGASVGSVREVTVVSGLPASTSTERLEILDDDRHILSFSVVG GEHRLRNYRSVTSVTEFQGQEDAGAPPYCVVLESYVVDVPPGNTEDDTRMFTDTVVKLNL QKLASVAEESGSRTRD
>BdPYRL3(BRADI3G08580)
MEPHMERALREALTEAERRSLAPVVAAHHTFPGSGQSSPSPSPGKKKTCTSLVTQRVDAP LAAVWAIVRGFATPQRYKHFIKSCALAAGDGATVGSVREVTVVSGLPASTSTERLEILDD DRHVLSFRVVGGEHRLRNYRSVTSVTEFSSPPPPEPEEKEKEETQDAAASSSYCVVVESY VVDVPEGNTEEDTRMFTDTVVKLNLQKLAAIATTSTSSPSASPSSPPPPQPSDGAQADH
>BdPYRL4(BRADI2G22510)
MPYTASRSRPSPAQRSRVGGGRKGAAAAVPEEVARHHEHAAGAGQCCSAVVQESIAAPVE AVWAVVRRFDRPQAYKHFIRSCRLVDGDGGAVGSVREVRVVSGLPATSSRERLEILDDER RVLSFRVVGGEHRLSNYRSVTTVHHAETTGSTVVVESYVVDVPAGNTADETRTFVDTIVR CNLQSLARTAEQLAAAD
>BdPYRL5(BRADI1G16710)
MPAPYSAAAAQQLQQHRPLAAAVTGSRCGEHDGTVPAEVAQHHSHPPSSSAGPWRCCSAV VQRVRAPTSAVWSVVRRFGEPQAYKSFVRSCAVVDGDGGVGTLREVRVVSGLPAASSRER LEVLDDDRRVLSFRVVGGEHRLRNYRSVTTVHPSSSSSSPAEEETVVVESYVVEVPAGNT AEDTRTFVDTIVKCNLLSLARTAEKLSAAGRCP
>BdPYRL6(BRADI1G65130)
MPCIPASSPSSIHHHHHQRHRVLAMGCGAELAAVQGASGMARCGAHDGEVPAEVSRHHEH AAADPAGSGMRCCSAVVQHVAAPAADVWSVVRRFDQPQAYKRFVRSCALVAGDGGVGTLR EVRVVSGLPAASSRERLEVLDDESHVLSFRVVGGEHRLKDYLSVTTVHPSPAAPSSATVV VESYVVDVPPGNTVEDTRVFIDTIVKCNLQSLAKTAEKLAAGGRAVS
>BdPYRL7(BRADI2G53840)
MPYTATRPSPPQHSRTVGAARNKAPLAVPLPAEVARYHEHAAGAGQCGSAVVQAIGAPAE AVWAVVRRFDRPQAYKRFVKSCRLVEDGGSVGVGSVREVRVVSGLPATCSRERLEVLDDE RRVLSFRIVGGEHRLANYRSVTTVSEVPVAGGAGKPVSVVVESYVVDVPPGNTGDETRVF VDTIVRCNLLSLARAAEAEAQLALAPVQSPRVS
>BdPYRL8(BRADI2G32250)
MVGLVDGSARGWRLSDEAATSGAGRGGGGGGVTAAADHMRRLHSHALGEHQCSSTLLKHI KAPVHLVWSLVRSFDQPQRYKPFVSRCVVRGGDLEIGSLREVNVKTGLPATTSTERLEQL DDEEHILSVKFVGGDHRLRNYSSIITVHPESIDGRPGTLVIESFVVDVPDGNTKDETCYF VEAVIKCNLTSLAEVSERLAVQSPTSPLEQ
>BdPYRL9(BRADI3G09580)
MVEIDGAVGVGGGAGGVEGARRWRLADERCDLRATESDYVRRFHPHEPRDHQCSSAVAKH IKAPVHLVWSLVRRFDQPQLFKPFVSRCEMKGNIEIGSVREVNVKSGLPATRSTERLELL DDTEHILSVKFVGGDHRLKNYSSILTVHPEVIDGRPGTLVIESFVVDVPEGNTKDETCYF VEALIKCNLKSLAEVSERLVVKDQTEPLDR
>OsPYL1(Os02t0255500-01)
MEQQEEVPPPPAGLGLTAEEYAQVRATVEAHHRYAVGPGQCSSLLAQRIHAPPAAVWAVV RRFDCPQVYKHFIRSCVLRPDPHHDDNGNDLRPGRLREVSVISGLPASTSTERLDLLDDA HRVFGFTITGGEHRLRNYRSVTTVSQLDEICTLVLESYIVDVPDGNTEDDTRLFADTVIR LNLQKLKSVSEANANAAAAAAAPPPPPPAAAE
>OsPYL2(Os06t0562200-01)
MEAHVERALREGLTEEERAALEPAVMAHHTFPPSTTTATTAAATCTSLVTQRVAAPVRAV WPIVRSFGNPQRYKHFVRTCALAAGDGASVGSVREVTVVSGLPASTSTERLEMLDDDRHI ISFRVVGGQHRLRNYRSVTSVTEFQPPAAGPGPAPPYCVVVESYVVDVPDGNTAEDTRMF TDTVVKLNLQMLAAVAEDSSSASRRRD
>OsPYL3(Os02t0226801-00)
ERGRGGVGAEDARGGADEVAARERLEGVVRAHHTFPAAERAAGPGRRPTCTSLVAQRVDA PLAAVWPIVRGFANPQRYKHFIKSCELAAGDGATVGSVREVAVVSGLPASTSTERLEILD DDRHVLSFRVVGGDHRLRNYRSVTSVTEFSSPSSPPRPYCVVVESYVVDVPEGNTEEDTR MFTDTVVKLNLQKLAAVATSSSPPAAGNHH
>OSPYL4(Os01t0827800-00）
MQPSTSCLTNDAYKISGTRTFVVNPDPPLSVSFLLYRGKRRQRRALDTMPYAAVRPSPPP QLSRPIGSGAGGGKACPAVPCEVARYHEHAVGAGQCFSTVVQAIAAPADAVWSVVRRFDR PQAYKKFIKSCRLVDGDGGEVGSVREVRVVSGLPATSSRERLEVLDDDRRVLSFRIVGGE HRLANYRSVTTVHEAAAPAMAVVVESYVVDVPPGNTWEETRVFVDTIVRCNLQSLARTVE RLAPEAPRANGSIDHA
>OsPYL5（Os05t0473000-01）
MMPYTAPRPSPPQHSRIGGCGGGGVLKAAGAAGHAASCVAVPAEVARHHEHAAGVGQCCS AVVQAIAAPVDAVWSVVRRFDRPQAYKHFIRSCRLLDGDGDGGAVAVGSVREVRVVSGLP ATSSRERLEILDDERRVLSFRVVGGEHRLSNYRSVTTVHETAAGAAAAVVVESYVVDVPH GNTADETRMFVDTIVRCNLQSLARTAEQLALAAPRAA
>OsPYL6（Os03t0297600-01）
MPCIPASSPGIPHQHQHQHHRALAGVGMAVGCAAEAAVAAAGVAGTRCGAHDGEVPMEVA RHHEHAEPGSGRCCSAVVQHVAAPAAAVWSVVRRFDQPQAYKRFVRSCALLAGDGGVGTL REVRVVSGLPAASSRERLEILDDESHVLSFRVVGGEHRLKNYLSVTTVHPSPSAPTAATV VVESYVVDVPPGNTPEDTRVFVDTIVKCNLQSLAKTAEKLAAGARAAGS
>OsPYL7（Os06t0526400-00）
MNSGAGGAGGAAVGRMPAGSLQWAQWRLADERCELREEEMEYMRRFHRHEIGSNQCNSFI AKHVRAPLQNVWSLVRRFDQPQIYKPFVRKCVMRGNVETGSVREIIVQSGLPATRSIERL EFLDDNEYILRVKFIGGDHMLKVIDGQPGTVVIESFVVDIPEENTKEDICYFVKNLLRCN LRTLADVSEESLASPC
>OsPYL8（Os06t0527800-01）
MNGAGGAGGAAAGKLPMVSHRRVQCRLADKRCELREEEMEYIRQFHRHEPSSNQCTSFVA KHIKAPLQTVWSLVRRFDQPQLFKPFVRKCVMRENIIVTGCVREVNVQSGLPATRSTERL ELLDDNEHILKVKFIGGDHMLKNYSSILTIHSEVIDGQLGTLVVESFVVDIPDGNTKDDI CYFIENVLRCNLMTLADVSEERLANP
>OsPYL9（Os06t0528300-00）
MNGVGGAGGAAAGKLPMVSHRRVQWRLADERCELREEEMEYIRRFHRHEPSSNQCTSFAA KHIKAPLHTVWSLVRRFDQPQLFKPFVRNCVMRENIIATGCIREVNVQSGLPATRSTERL ELLDDNEHILKVNFIGGDHMLKNYSSILTVHSEVIDGQLGTLVVESFIVDVPEGNTKDDI SYFIENVLRCNLRTLADVSEERLANP
>OsPYL10（Os02t0255500-01）
MVEVGGGAAEAAAGRRWRLADERCDLRAAETEYVRRFHRHEPRDHQCSSAVAKHIKAPVH LVWSLVRRFDQPQLFKPFVSRCEMKGNIEIGSVREVNVKSGLPATRSTERLELLDDNEHI LSVRFVGGDHRLKNYSSILTVHPEVIDGRPGTLVIESFVVDVPEGNTKDETCYFVEALLK CNLKSLAEVSERLVVKDQTEPLDR
>OsPYL11（Os05t0213500-01）
MVGLVGGGGWRVGDDAAGGGGGGAVAAGAAAAAEAEHMRRLHSHAPGEHQCSSALVKHIK APVHLVWSLVRSFDQPQRYKPFVSRCVVRGGDLEIGSVREVNVKTGLPATTSTERLELLD DDEHILSVKFVGGDHRLRNYSSIVTVHPESIDGRPGTLVIESFVVDVPDGNTKDETCYFV EAVIKCNLTSLAEVSERLAVQSPTSPLEQ
>OsPYL12（Os02t0255300-00）
MVEMDAGGRPEPSPPSGQCSSAVTMRINAPVHLVWSIVRRFEEPHIFQPFVRGCTMRGST SLAVGCVREVDFKSGFPAKSSVERLEILDDKEHVFGVRIIGGDHRLKNYSSVLTAKPEVI DGEPATLVSESFVVDVPEGNTADETRHFVEFLIRCNLRSLAMVSQRLLLAQGDLAEPPAQ
>GmPYL1 (Glyma.01G097000)
MEKTHSSSAEEQDPTRRHLDPPPGLTAEEFEDLKPSVLEHHTYSVTPTRQSSSLLAQRIHAPPHAVWSVVRCFDNPQAYKHFIKSCHVKEGFQLAVGSTRDVHVISGLPAATSTERLDLLDDDRHVIGFTIVGGDHRLRNYRSVTSVHGFECDGKIWTVVLESYVVDVPEGNTEEDTRLFADTVVKLNLQKLASVSEGMCGDGDGDGDGKGNKS
>GmPYL2 (Glyma.08G272500)
MDKTHSGEEQDPNPTHPTRNHLDPPPGLTPEEFEDLKPSVLEHHTYSVTPTRQCSSLLAQRIHAPPHTVWTVVRCFDNPQAYKHFIKSCHVKEGFQLAVGSTRDVHVISGLPAATSTERLDLLDDDRHVIGFTIVGGDHRLRNYRSVTSVHGFERDGKIWTVVLESYVVDVPEGNTEEDTRLFADTVVKLNLQKLASVTEGMCGDSDGKGNN
>GmPYL3 (Glyma.01G018800)
MEKAESSASTSEPDSDENHHRHPTNHHINPPSGLTPLEFASLIPSVAEHHSYLVGSGQCSSLLAQRVQAPPDAVWSVVRRFDKPQTYKHFIKSCAVKEPFHMAVGVTRDVNVISGLPAATSTERLDLLDDIRCVTGFSIIGGEHRLRNYRSVTTVHSFEDDADDGKIYTVVLESYVVDVPDGNTEEDTRLFADTVVKLNLQKLASVTEGTNRDGDGKSHSR
>GmPYL4 (Glyma.09G204100)
MFREEFPRIPPHVPQNLVSKAPIASPTHTLSPSPSSLAFSLPAMEKAESSASTSEPDSDDNHHRHPTNHHLNPPSGLTPLEFASLVPSVAEHHSYLVGPGQCSSLLAQRVHAPPDAVWSFVRRFDKPQTYKHFIKSCAVKEPFHMAVGVTRDVNVISGLPAATSTERLDFLDDVRRVTGFSIIGGEHRLRNYRSVTTVHSFDDDNASADGKIYTVVLESYVVDVPDGNTEEDTRLFADTVVKLNLQKLASVTEGTNGDGDGKPHSR
>GmPYL5 (Glyma.17G229900)
MASETHHHVQGLTPEELTQLEPIIKKYHLFEASSNKCFSIITHRIEAPASSVWPLVRNFDNPQKYKHFIKGCNMKGDGSVGSIREVTVVSGLPASTSTERLEILDDDKHVLSFRVVGGEHRLQNYRSVTSVNEFHKEGKVYTIVLESYIVDIPEGNTEEDTKMFVDTVVKLNLQKLGVVAMASSMNGR
>GmPYL6 (Glyma.14G093700)
MTILPHSNNKSSNHKFIAHQNYMASETHHHVQGLTPEELTKLEPIIKKYHLFEQSPNTCFSIITYRIEAPAKAVWPFVRSFDNPQKYKHFIKGCNMRGDGGVGSIREVTVVSGLPASTSTERLEILDDDKHVLSFRVVGGEHRLKNYRSVTSVNEFNKEGKVYTIVLESYIVDIPEGNTEEDTKMFVDTVVKLNLQKLGVVAMASSMHGQ
>GmPYL7 (Glyma.06G051800)
MASEAYDPVLGLTPEEFTELESTINTHHKFEASPEICSSIIAQRIDAPAHTVWPLVRSFENPQKYKHFVKSCNMRSGDGGVGSIREVTVVSGLPASTSTERLEILDDDNHLLSFRVVGGEHRLHNYRSVTSVNEFKRPDNGKVYTIVLESYVVDIPEGNTGVDTKMFVDTVVKLNLQKLGEVAMATN
>GmPYL8 (Glyma.04G050900)
MASEAYPVLGLTPEEFSELESIINTHHKFEPSPEICSSIIAQRIDAPAHTVWPLVRSFENPQKYKHFVKSCNMRSGDGGVGSIREVTVVSGLPASTSTERLEILDDDKHLLSFRVVGGEHRLHNYRSVTSVNEFKNPDNGKVYTIVLESYVVDIPEGNTGVDTKMFVDTVVKLNLQKLGEVAMATTTLH
>GmPYL9 (Glyma.01G124700)
MLQNSSMSSLLLHRINGGGGATTATNCHDTVFMTVPDGVARYHTHAVAPNQCCSSVAQEIGASVATVWSVLRRFDNPQAYKHFVKSCHVIGGDGDVGTLREVHVISGLPAARSTERLEILDDERHVISFSVVGGDHRLANYRSVTTLHPTASSASGGCSGTVVVESYVVDVPPGNTREDTRVFVDTIVKCNLQSLAQTAENLTLRKNNNNDYKCCS
>GmPYL10 (Glyma.07G155500)
MSPNNPSTIVSDAVARHHTHVVSPHQCCSAVVQEIAAPVSTVWSVVRRFDNPQAYKHFVKSCHVILGDGDVGTLREVRVISGLPAAVSTERLDVLDDERHVIGFSMVGGDHRLSNYRSVTILHPRSATDTVVVESYVVDVPAGNTTEDTRVFVDTILRCNLQSLAKFAENLTNKLHQR
>GmPYL11 (Glyma.18G206000)
MLPNNPSTIVPDAVARHHTHVVSPQQCCSAVVQEIAAPVSTVWSVVRRFDNPQAYKHFVKSCHVILGDGDVGTLREVHVISGLPAAVSTERLDVLDDERHVIGFSMVGGDHRLFNYRSVTTLHPRSAAGTVVVESYVVDVPPGNTTEDTRVFVDTILRCNLQSLAKFAENLTKLHQR
>GmPYL12 (Glyma.11G233300)
MLLLQHQQTHIYIAPEIFFYYKFKLIIIMPSSLHFDRFNPITHAATTVAIANGVNCPKQPQAPPSSTAARRLVVPSLSSGRGIAAPDTVALHHAHVVDPNQCCSIVTQHINAPVSAVWAVVRRFDNPQGYKNFVRSCHVITGDGIRVGAVREVRVVSGLPAETSTERLEILDDERHVISFSMVGGDHRLRNYQSVTTLHANGNGTLVIESYVVDVPQGNTKEETCVFVDTIVRCNLQSLAQIAENRTNNCEHTAQHC
>GmPYL13 (Glyma.02G261900)
MTSLQFHRFNPATDTSTAIANGVNCPKPPSTLRLLAKVSLSVPETVARHHAHPVGPNQCCSVVIQAIDAPVSAVWPVVRRFDNPQAYKHFVKSCHVVAAAGGGEDGIRVGALREVRVVSGLPAVSSTERLEILDDERHVMSFSVVGGDHRLRNYRSVTTLHGDGNGGTVVIESYVVDVPPGNTKEETCVFVDTIVRCNLQSLAQIAET
>GmPYL14 (Glyma.14G056300)
MTCPLQLHRFSPATDTSTAIANGVNCPKPAQTAPSTRRLLAKVGLSVTEMVARHHAHAVGPNQCCSFVIQAIDAPVSAVWPVVRRFDNPQAYKHFVKSCHVVAAGGAGGDGGIHVGALREVRVVSGLPAVSSTERLEILDDERHVMSFSVVGGDHRLRNYRSVTTLHGDGSNGGTVVIESYVVDIPAGNTKEETCVFVDTIVRCNLQSLAQMAENMGS
>GmPYL15 (Glyma.16G025900)
MGITIGIQCLEIEEISICDGMFCYLVDFVDVKEKMNYCLMWFGYFPSQVWSLVRRFDQPQKYKPFVSRCIMQGDLGIGSVREVNVKSGLPATTSTERLEQLDDEEHILGIRIVGGDHRLRNYSSIITVHPEVIDGRPSTMVIESFVVDVPDGNTRDETCYFVEALIRCNLSSLADVSERMAVQGRTDPINH
>GmPYL16 (Glyma.07G056900)
MNGGESYGAIETQYIRRHHKHEPRENQCTSALVKHIRAPVHLVWSLVRRFDQPQKYKPFVSRCIMQGDLGIGSVREVNVKSGLPATTSTERLEQLDDEEHILGIRIVGGDHRLRNYSSIITVHPEVIDGRPGTMVIESFVVDVPDGNTRDETCYFVEALIRCNLSSLADVSERMAVQGRTNPINH
>GmPYL17 (Glyma.13G041800)
MNGIGNDGGGGLSNVEMEYIRRHHRHEPGENQCGSALVKHIRAPVPQVWSLVRRFDQPQKYKPFVSRCVVRGNLEIGSLREVDVKSGLPATTSTERLELLDDNEHLLSIRIIGGDHRLRNYSSIMSLHPEIIDGRPGTLVIESFVVDVPEGNTKDETCYFVEALIKCNLKSLADVSEGIAVQDRTEPIDRI
>GmPYL18 (Glyma.03G066200)
MNRIGNGGGGGGGLSNVEMEYIRRHHRHEPGENQCGSALVKHIRAPVPQVWSLVRRFDQPQKYKPFISRCVVRGNLEIGSLREVDVKSGLPATTSTERLELLDDNEHILSIRIIGGDHRLRNYSSIMSLHPEIIDGRPGTLVIESFVVDVPEGNTKDETCYFVEALIKCNLKSLADVSEGLAVQDCTEPIDRI
>GmPYL19 (Glyma.06G126100)
MTELSSREVEYIRRHHSKAAEDNQCASALVKHIRAPLPLVWSLVRRFDEPQKYKPFVSRCVVRGNLEIGSLREVDVKSGLPATTSTERLEILDDNHHILSVRIIGGDHRLRNYSSIMSLHPEIVDGRPGTLVIESFVVDIPEGNTKDETCYFVEALIKCNLKSLADVSEGLTLQDHTEPIDRKYELLITRG
>GmPYL20 (Glyma.13G229300)
MLCKQDLETPTIKAMLNTYHASKLSSNQCGSSLVQTIDAPLPLVWSLIRRFEYPQGYKLFVKKCNLLDGDGGIGSVREVMITSGLPAGVSVERLDKLDDDKHVLKFSIIGGDHRLVNYSSTITLHEEEEEYGGKTVAIESYAVDVPAGSSGDDTCSFANTIIACNLRSLAKITEEKVCKVNQIKL
>GmPYL21 (Glyma.15G083200)
MLCKQNLETPTIKAMLNTYHASKLPSNQCGSSLVQTIDAPLPLVWSLIRRFEYPQGYKLFVKKCTLLDGNGGIGSVREVMVTSGLPAGVSVERLDKLDDDKHVFKFSIIGGDHRLVNYSSTITLHQEEEEYGGKTVAIESYAVDVPAGSTVDDTCSFANTIIACNLRSLAKITEEMVCKANQIKV
>MdPYL1 (MD01G1078900)
MSIGGGDSVEAEYIRRHHRHEPRENQCTSALVRHIKAPVHLVWSLVRRFDQPQKYKPFVSRCTMKGDLGIGSVREVNVKSGLPATTSTERLELLDDDEHILGIRIVGGDHRLRNYSSIITVHREVIEGRPGTLVIESFVVDVPDGNTKDETCYFVEALIRCNLKSLADVSERMAVQDRTEPINQ
>MdPYL2 (MD01G1158500)
MPSPIQFQRPINPPNYHHPANTIHHKQFQSQAVVAALDLTRHHSLVMAPNQCCSSVVQSIEAPVPTVWSVVRRFDNPQAYKHFLKSCHVIDGNGDVGTLREVHVVSGLPAGSSTERLEILDDERHVISFSVVGGDHRLTNYRSVTTLHDSPNGVGTIVVESYVVDVPPGNTKEETCVFVDTIVRCNLQSLAQIAESMANKPTTKKPS
>MdPYL3 (MD01G1216100)
MNGNRNGGGGGGGGGGGGFGGIVSDYIRRHHKHDLNDHQCTSTLVRHIKAPVHLVWSLVRRFDQPQKYKPFVSRCVVQGNLEIGSLREVDVKSGLPATTSTERLELLDDDEHILSIKIIGGDHRLRNYSSIISLHPEIIDGRPGTLVIESFVVDIPEGNTKDETCYFVEALIQCNLKSLSDVSERLAVQDQTEPIDRL
>MdPYL4 (MD04G1165000)
MPPNPPKSSVLIHRVHTATSATSNTASSQYQNQRGGGSAALLLNNNSNNNGKKRATVPEAVARHHTHAVGPNQCCSAVTQEIAAPVSTVWSVVRRFDNPQAYKHFVKSCHVIEGGGDVGTLREVQVISGLPANSSTERLEILDDESHVISFSMVGGDHRLSNYRSVTTLHPSSRAGGGTVVVESYVVDVPHGNTNDDTCMFVDTIVRCNLQSLAQIAEDLARCNAADDYSGSGQLAAWLGSQEQDHSTDVCISQHWHN
>MdPYL5 (MD05G1300200)
MSYPTSQNTSPLSESQGMIDTYHVHDLLPNQCGSVLVQTIDAPLTLVWSVLRQFDNPQAYKPFVNSCSIRAGNGGIGSIREVVIKSGLPAKTSTERLDELDDNMHVMHYSVIGGDHRLANYSSTTTVHNVEEENGRKNKTVVIQSYVVDIPAGSSKEDTCLFANTIIGCNLKSLAKVSEKMAATC
>MdPYL6 (MD06G1034000)
MEKSEGSMAEQDAAEETQHHLILPSGLTQNEFDELKSFVNEFHKYHVGPGKCSSLLAQRVHAPPNTVWSVVRRFDQPQAYKHFIRSCNVEEGFKMTVGCTRDVNVISGLPAATSTERLDLLEEDRQVTGFSIIGGEHRLRNYRSVTTVHGFDRDGRISTVVLESYVVDVPEGNSEEDTRLFADTVVKLNLQKLASVTEGMAGDGGR
>MdPYL7 (MD07G1147700)
MSSGGGDSMEAEYIRRHHRHEPRENQCTSALVRHIKAPVHLVWSLVRRFDQPQKYKPFVSRCTMKGDLGIGSVREVNVKSGLPATTSTERLELLDDDEHILGIRIVGGDHRLRNYSSIITVHPEVIEGRPGTLVIESFVVDVPEGNTKDETCYFVEALIRCNLKSLADVSERMAVQDRTEPINH
>MdPYL8 (MD07G1227100)
MSSPIQFQRPISPPNYHHPTNTIHHKQFQSQAVAAAVDLTRYHSHVMAPNQCCSAVVQSIEAPVQTVWSVVRRFDNPQAYKHFLKSCHVIDGNGDVGTVREVHVVSGLPAGSSTERLEILDDERHVISFSVVGGDHRLTNYRSVTTLHDSPNGVGTVVVESYVVDVPPGNTKEETCVFVDTIVRCNLQSLAQIAESMADKPNTKKPS
>MdPYL9 (MD07G1286000)
MMNGNKNGGGGGGGGGGGGGGGVGFGGIVSDYIRRHHRHDLNDHQCTSTLVRYIKAPVHLVWSLVRRFDQPQKYKPFVSRCVVQGNLEIGSLREVDVKSGLPATTSTERLELLDDEEHILSIKIIGGDHRLRNYSSIISLHPEIIDGRPGTLVIESFVVDIPEGNTKDETCYFVEALIQCNLKSLSDVSERLAVQDRTEPIDRL
>MdPYL10 (MD08G1043500)
MDASSAPPYGLTLAEFSELENLIDTYHKFEPSPNTCTSLITQKIEAPAQQVWPLVRSFDSPHRYKHFIKSCNMKGDGGVGSIREVTVVSGLPASTSTERLEILDDEKHIISFRVVGGEHRLNNYRSVTSVNEFVNCKGEEGDNQVYSIVLESYVVDIPEGNTEEDTKMFVDTVIKLNLQKLGVMAMAANLHGSTGGGHDQS
>MdPYL11 (MD12G1178800)
MPPNPPKSSVLLHRVHTATSATSNMASSQYQNQRGGGAAALLLNNNSNNNSKKRATVPEVVAGHHTHAVGPNQCCSAVTKEIAAPVSTVWSVVRRFDNPQAYKHFVKSCHVIAGGGDVGSLREVQVISGLPANNSTERLEILDDESHVISFSMVGGDHRLSNYRSVTTLHPSSRAGGGTVVVESYVVDVPHGNTRDDTCIFVDTIVRCNLQSLAQIAEDIASKTQEDTKEHQKWKGRQSLSNL
>MdPYL12 (MD15G1060800)
MDAGHAPPYGLTLAEFSELEGLIDAYHKFEPSPNTCTSLITQKIEAPAQQIWPLVRNFDNPKKYKHFIKSCNMKGDGGVGSIREVTVVSGLPASTSTERLEILDDEKHIISFRVMGGEHRLNNYRSVTSVNEFVNCDGEEGNNQVYSIVLESYVVDIPGGNTGEDTKMFVDTVIKLNLQKLGVVAMAANVVHGNTGGGHDQS
>MdPYL13 (MD16G1274400)
MEKGEGSMAEQDEAEETQHHRSLPSGLTQDEFDELKQFVNEFHKYQVGPGKCSSLLAQRVHAPPDTVWSVVRRFDQPQTYKHFIRSCNVKEGFKMTVGCTRDVNVISGLPAATSTERLDLLDEDRHVTGFSIIGGEHRLRNYRSVTTVHGFDRDRRIWTVVLESYVVDLPDGNSEEDTRLFADTVVKLNLQKLASVTEGLAGDGGC
>VvPYRL1(GSVIVT01013161001)
MEEIEKYKTSSHFSSPASLFAAMNKAETSSMAEAESEDSETTTPTTHHLTIPPGLTQPEFQELAHSISEFHTYQVGPGQC SSLLAQRVHAPLPTVWSVVRRFDKPQTYKHFIKSCHVEDGFEMRVGCLRDVNVISGLPAETSTERLDILDDERHVTGFSI IGGEHRLRNYRSVTTVHEYQNHGGEIWTVVLESYVVDMPEGNTEEDTRLFADTVVKLNLQKLASVTEGMARDQGCFYPLR CMISRVCSMSLIKMITLDGILSSYFKLSEREADFHVGCPTSCFIYA
>VvPYRL2(GSVIVT01035362001)
MDPHHHHGLTEEEFRALEPIIQNYHTFEPSPNTCTSLITQKIDAPAQVVWPFVRSFENPQKYKHFIKDCTMRGDGGVGSI REVTVVSGLPASTSTERLEILDDEKHILSFRVVGGEHRLNNYRSVTSVNDFSKEGKDYTIVLESYIVDIPEGNTGEDTKM FVDTVVKLNLQKLAVVAITSLHENE
>VvPYRL3(GSVIVT01019517001)
MSGYGCIKMEDEYIRRHHRHEIRDNQCSSSLVKHIKAPVHLVWSLVRSFDQPQKYKPFVSRCIVQGDLEIGSVREVNVKS GLPATTSTERLELLDDEEHIFGMRIVGGDHRLKNYSSIVTVHPEIIDGRPGTLVIESFVVDVPDGNTKDETCYFVEALIK CNLKSLADVSERLAIQDRTEPIDRM
>VvPYRL4(GSVIVT01028704001)
MNGNGLSSMESEYIRRHHRHEPAENQCSSALVKHIKAPVPLVWSLVRRFDQPQKYKPFISRCVVQGNLEIGSLREVDVKS GLPATTSTERLELLDDDEHILSMRIIGGDHRLRNYSSIISLHPEIIDGRPGTMVIESYVVDVPEGNTKDETCYFVEALIK CNLKSLADVSERLAVQDRTEPIDRM
>VvPYRL5(GSVIVT01027078001)
MMEAQVICRHHAHEPRENQCSSVLVRHVKAPANLVWSLVRRFDQPQKYKPFVSRCVVQGDLRIGSVREVNVKTGLPATTS TERLELFDDDEHVLGIKILDGDHRLRNYSSVITVHPEIIDGRPGTLVIESFVVDVPEGNTKDDTCYFVRALINCNLKCLA EVSERMAMLGRVEPANAV
>AtPYL1(AT5G46790）
MANSESSSSPVNEEENSQRISTLHHQTMPSDLTQDEFTQLSQSIAEFHTY QLGNGRCSSLLAQRIHAPPETVWSVVRRFDRPQIYKHFIKSCNVSEDFEM RVGCTRDVNVISGLPANTSRERLDLLDDDRRVTGFSITGGEHRLRNYKSV TTVHRFEKEEEEERIWTVVLESYVVDVPEGNSEEDTRLFADTVIRLNLQK LASITEAMNRNNNNNNSSQVR
>AtPYL2（AT2G26040）
MSSSPAVKGLTDEEQKTLEPVIKTYHQFEPDPTTCTSLITQRIHAPASVV WPLIRRFDNPERYKHFVKRCRLISGDGDVGSVREVTVISGLPASTSTERL EFVDDDHRVLSFRVVGGEHRLKNYKSVTSVNEFLNQDSGKVYTVVLESYT VDIPEGNTEEDTKMFVDTVVKLNLQKLGVAATSAPMHDDE
>AtPYL3（AT1G73000）
MNLAPIHDPSSSSTTTTSSSTPYGLTKDEFSTLDSIIRTHHTFPRSPNTC TSLIAHRVDAPAHAIWRFVRDFANPNKYKHFIKSCTIRVNGNGIKEIKVG TIREVSVVSGLPASTSVEILEVLDEEKRILSFRVLGGEHRLNNYRSVTSV NEFVVLEKDKKKRVYSVVLESYIVDIPQGNTEEDTRMFVDTVVKSNLQNL AVISTASPT
>AtPYL4（AT2G38310）
MLAVHRPSSAVSDGDSVQIPMMIASFQKRFPSLSRDSTAARFHTHEVGPN QCCSAVIQEISAPISTVWSVVRRFDNPQAYKHFLKSCSVIGGDGDNVGSL RQVHVVSGLPAASSTERLDILDDERHVISFSVVGGDHRLSNYRSVTTLHP SPISGTVVVESYVVDVPPGNTKEETCDFVDVIVRCNLQSLAKIAENTAAE SKKKMSL
>AtPYL5（AT5G05440)
MRSPVQLQHGSDATNGFHTLQPHDQTDGPIKRVCLTRGMHVPEHVAMHHT HDVGPDQCCSSVVQMIHAPPESVWALVRRFDNPKVYKNFIRQCRIVQGDG LHVGDLREVMVVSGLPAVSSTERLEILDEERHVISFSVVGGDHRLKNYRS VTTLHASDDEGTVVVESYIVDVPPGNTEEETLSFVDTIVRCNLQSLARST NRQ
>AtPYL6(AT2G40330)
MPTSIQFQRSSTAAEAANATVRNYPHHHQKQVQKVSLTRGMADVPEHVEL SHTHVVGPSQCFSVVVQDVEAPVSTVWSILSRFEHPQAYKHFVKSCHVVI GDGREVGSVREVRVVSGLPAAFSLERLEIMDDDRHVISFSVVGGDHRLMN YKSVTTVHESEEDSDGKKRTRVVESYVVDVPAGNDKEETCSFADTIVRCN LQSLAKLAENTSKFS
>AtPYL7(AT4G01026)
MEMIGGDDTDTEMYGALVTAQSLRLRHLHHCRENQCTSVLVKYIQAPVHL VWSLVRRFDQPQKYKPFISRCTVNGDPEIGCLREVNVKSGLPATTSTERL EQLDDEEHILGINIIGGDHRLKNYSSILTVHPEMIDGRSGTMVMESFVVD VPQGNTKDDTCYFVESLIKCNLKSLACVSERLAAQDITNSIATFCNASNG YREKNHTETNL
>AtPYL8(AT5G53160)
MEANGIENLTNPNQEREFIRRHHKHELVDNQCSSTLVKHINAPVHIVWSL VRRFDQPQKYKPFISRCVVKGNMEIGTVREVDVKSGLPATRSTERLELLD DNEHILSIRIVGGDHRLKVINESKGSFSVYSESKTYMFYIVFGFRTILQS SLFTPRL
>AtPYL9(AT1G01360)
MMDGVEGGTAMYGGLETVQYVRTHHQHLCRENQCTSALVKHIKAPLHLVW SLVRRFDQPQKYKPFVSRCTVIGDPEIGSLREVNVKSGLPATTSTERLEL LDDEEHILGIKIIGGDHRLKNYSSILTVHPEIIEGRAGTMVIESFVVDVP QGNTKDETCYFVEALIRCNLKSLADVSERLASQDITQ
>AtPYL10(AT4G27920)
MNGDETKKVESEYIKKHHRHELVESQCSSTLVKHIKAPLHLVWSIVRRFD EPQKYKPFISRCVVQGKKLEVGSVREVDLKSGLPATKSTEVLEILDDNEH ILGIRIVGGDHRLKNYSSTISLHSETIDGKTGTLAIESFVVDVPEGNTKE ETCFFVEALIQCNLNSLADVTERLQAESMEKKI
>AtPYL11(AT5G45860)
METSQKYHTCGSTLVQTIDAPLSLVWSILRRFDNPQAYKQFVKTCNLSSG DGGEGSVREVTVVSGLPAEFSRERLDELDDESHVMMISIIGGDHRLVNYR SKTMAFVAADTEEKTVVVESYVVDVPEGNSEEETTSFADTIVGFNLKSLA KLSERVAHLKL
>AtPYL12(AT5G45870）
MKTSQEQHVCGSTVVQTINAPLPLVWSILRRFDNPKTFKHFVKTCKLRSG DGGEGSVREVTVVSDLPASFSLERLDELDDESHVMVISIIGGDHRLVNYQ SKTTVFVAAEEEKTVVVESYVVDVPEGNTEEETTLFADTIVGCNLRSLAK LSEKMMELT
>AtPYL13（AT4G18620）
MESSKQKRCRSSVVETIEAPLPLVWSILRSFDKPQAYQRFVKSCTMRSGG GGGKGGEGKGSVRDVTLVSGFPADFSTERLEELDDESHVMVVSIIGGNHR LVNYKSKTKVVASPEDMAKKTVVVESYVVDVPEGTSEEDTIFFVDNIIRY NLTSLAKLTKKMMK
>AtPYR1（AT4G17870）
MPSELTPEERSELKNSIAEFHTYQLDPGSCSSLHAQRIHAPPELVWSIVR RFDKPQTYKHFIKSCSVEQNFEMRVGCTRDVIVISGLPANTSTERLDILD DERRVTGFSIIGGEHRLTNYKSVTTVHRFEKENRIWTVVLESYVVDMPEG NSEDDTRMFADTVVKLNLQKLATVAEAMARNSGDGSGSQVT
