# Supplementary material for: Genome-wide identification and expression analysis of the cucumber PYL gene family
Source: PeerJ. 2022 Jan 11;10:e12786. doi: 10.7717/peerj.12786 (PMC8759363; doi:10.7717/peerj.12786)
Supplement: Supplemental Information 5 [file peerj-10-12786-s005.xlsx]

## Sheet: CT value
	3h					6h					12h					24h					ck1	ck2
	T1	T2	T3	T4		T1	T2	T3	T4		T1	T2	T3	T4		T1	T2	T3	T4				average
PYL1	26.66	27.79	28.43	25.71		26.46	25.09	27.04	26.89		26.49	27.02	27.65	27.03		28.74	28.21	27.79	26		29.87	28.95	29.41
PYL1	26.36	27.63	28.24	25.4		26.28	24.91	26.95	27.12		26.84	27.15	28.26	26.84		28.36	27.78	27.81	25.76		28.26	28.37	28.315
PYL1	26.65	27.88	28.86	25.86		26.26	25.1	26.68	27.24		27.43	27	27.87	26.66		28.49	28.05	28.12	25.97		29.29	29.33	29.31
PYL2	26.53	27.8	28.45	25.35		26.42	24.85	26.97	27.3		26.69	26.95	27.65	26.6		28.47	27.47	27.66	26.18		26.84	28.86	27.85
PYL2	26.41	27.41	28.41	25.42		26.17	24.98	27.06	27.51		26.61	26.61	27.8	26.74		28.02	27.83	28.09	25.94		29.19	28.52	28.855
PYL2	26.75	27.73	28.55	25.91		26.54	25.24	26.86	26.78		26.89	26.8	27.78	26.75		28.51	27.79	27.73	25.95		29.34	28.71	29.025
PYL3	23.17	25.55	25.35	22.46		24.11	22.8	23.74	24.42		24.96	27.47	26.17	24.53		24.69	26.21	24.25	23.44		25.45	25.06	25.255
PYL3	23.39	25.31	25.29	22.37		23.77	23.14	23.61	24.5		24.73	27.37	26.14	24.51		25.08	26.33	24.12	23.47		25.49	24.87	25.18
PYL3	23.54	25.33	25.13	22.47		23.93	22.84	23.6	24.35		24.56	27.26	26.17	25.08		24.51	26.17	23.94	23.2		25.62	25	25.31
PYL4	23.06	24.71	25.16	22.55		23.4	22.59	23.6	24.78		22.18	22.61	23.13	22.72		23.74	23.66	23.84	23.97		22.78	23.53	23.155
PYL4	23.47	24.72	24.81	22.88		23.17	22.61	23.17	25.37		22.53	22.67	22.94	22.64		24.1	23.73	23.38	23.19		21.83	23.78	22.805
PYL4	23.95	24.91	24.55	22.82		23.44	22.43	23.4	25.04		22.36	23.47	22.84	22.32		23.79	23.54	23.24	23.2		22.75	23.79	23.27
PYL5	24.88	26.35	26.49	24.32		24.93	23.42	24.08	26.87		23.01	23.42	24.08	23.28		25.66	24.38	26.18	24.82		26.96	26.14	26.55
PYL5	25.18	26.65	26.63	24.2		24.96	23.47	24.17	26.26		22.96	23.43	24.23	23.15		25.71	24.96	26.07	24.57		26.9	26.23	26.565
PYL5	25.44	26.53	26.86	24.33		24.64	23.22	24.02	26.16		23.04	23.34	24.31	23.08		25.69	24.79	26.18	24.34		26.87	26.04	26.455
PYL6	24.19	25.56	25.4	23.16		23.97	21.99	23.29	25.25		21.23	22.06	22.65	21.93		23.3	22.79	23.46	22.41		23.27	22.55	22.91
PYL6	24	25.62	25.57	23.54		23.8	22.08	23.19	25.06		21.21	21.92	22.7	21.97		23.36	22.83	23.16	22.43		23.31	22.65	22.98
PYL6	23.94	25.55	25.32	23.45		23.82	22.02	23.11	25.37		21.08	22.01	22.91	22.25		23.41	23.12	23.1	22.26		23.35	22.54	22.945
PYL7	29.36	30.45	30.09	27.52		29.57	27.17	27.76	29.04		26.24	26.85	28	26.11		29.89	28.21	29.55	28.35		29.62	28.99	29.305
PYL7	28.57	30.35	29.91	27.86		29.09	27.21	27.79	29.31		25.94	27.09	27.98	26.07		29.97	29.1	29.32	28.15		29.41	28.61	29.01
PYL7	28.82	29.93	29.16	27.7		29.18	27.49	27.94	29.52		26.13	27.09	27.61	25.99		30.36	28.32	29.8	28.11		29.24	28.5	28.87
PYL8	31.39	32.89	32.73	30.41		29.69	27.15	28.21	31.31		28.21	29.08	29.53	27.83		33.07	29.23	30.18	32.31		33.57	33.09	33.33
PYL8	31.22	32.22	32.93	30.46		29.07	26.93	28.28	31.67		28.35	29.08	29.39	27.95		33.11	29.61	30.43	32.36		33.25	33.04	33.145
PYL8	30.89	32.72	32.59	30.46		29.53	27.24	28.55	31.29		28.28	29.17	29.56	27.91		32.95	29.38	30.23	32.49		33.61	32.72	33.165
PYL9	24.15	26.23	26.69	23.98		24.27	23.04	24.11	24.76		24.03	24.65	25.29	24.13		24.5	23.21	23.76	24.37		25.47	25.45	25.46
PYL9	24.35	25.44	26.28	23.82		24.03	22.73	23.95	25.21		23.62	24.48	25.02	23.82		24.28	23.07	23.76	24.18		25.96	24.91	25.435
PYL9	24.67	25.6	26.27	24.14		24.1	23.22	24.32	25.16		24.09	24.48	25	24.06		24.99	23.15	23.42	24.14		25.94	25.47	25.705
PYL10	28.88	29.65	29.12	28.03		26.93	26.04	27.5	27.82		26.46	26.77	26.65	26.27		28.53	27.34	28.5	28.48		29.56	29.02	29.29
PYL10	28.64	29.84	29.49	28		26.86	26.05	26.88	27.72		26.11	26.69	27.01	26.29		28.04	27.51	28.43	28.76		29.05	29.38	29.215
PYL10	28.63	29.58	29.72	28.17		27.62	25.89	27.08	27.88		25.94	26.55	26.53	26.2		28.24	27.28	29.04	28.89		29.08	28.98	29.03
PYL11	29.87	29.75	29.96	29.08		29.12	28.12	30.48	30.63		29.85	29.26	29.4	30.2		27.88	28.04	27.56	28.98		28.37	28.33	28.35
PYL11	30.55	29.63	30.38	29.12		29.23	27.83	29.89	31.25		29.87	29.69	29.12	30.31		27.94	27.83	27.2	28.94		29.27	28.2	28.735
PYL11	30.77	29.83	29.3	29.06		29.31	27.68	30.54	31.34		29.93	29.05	28.95	30.01		28.05	27.75	27.92	28.62		28.85	27.82	28.335
PYL12	31.41	31.32	29.66	30.34		29.71	28.97	28.08	30.86		29.03	29.22	31.78	30.22		29.97	29.29	31.65	30.56		31.73	30.27	31
PYL12	31.14	31.12	29.44	29.93		29.14	28.95	28.11	30.83		29.36	28.96	31.87	29.96		30.08	29.46	31.57	30.47		31.27	30.77	31.02
PYL12	31.39	31.55	29.78	29.63		29.36	28.25	28.24	30.95		29.17	29.12	31.85	30.27		30.47	28.96	30.86	30.83		31.56	30.35	30.955
PYL13	33.47	32.25	32.42	31.35		32.63	30.76	31.13	32.69		32.34	30.55	31.53	31.38		30.22	29.58	30.92	30.08		32.65	32.83	32.74
PYL13	33.73	31.97	32.29	31.5		32.84	30.96	31.08	32.23		31.38	30.85	32.88	31.04		30.84	29.67	31.79	30.8		32.09	32.51	32.3
PYL13	33.14	32.34	33.31	30.79		32.43	30.46	30.21	32.72		31.37	31.23	31.92	30.78		30.41	29.82	31.75	31.15		32.39	31.75	32.07
PYL14	21.81	22.86	23.07	21.56		21.54	20.47	20.75	22.95		22.08	22.52	22.13	22.25		22.08	22.21	20.98	21.36		21.3	21.95	21.625
PYL14	21.62	22.92	23.01	21.47		21.74	20.33	20.78	22.67		22.54	22.56	22.08	21.99		22.25	22.33	20.96	21.29		21.31	21.67	21.49
PYL14	21.58	22.73	22.91	20.98		21.25	20.72	19.61	22.38		21.64	22.5	21.87	22.08		22.49	22.53	20.89	20.9		21.33	21.81	21.57
actin	21	22.18	21.94	20.4		21.44	20.21	20.69	22.99		21.32	21.64	22.03	21.78		20	21.32	21.18	20.31		21.08	20.8	20.94
actin	21.81	22.28	21.78	21.18		21.04	20.38	20.53	22.78		21.72	21.54	22.05	21.73		21.04	21.51	20.86	20.21		21.24	21.47	21.355	21.175
actin	21.64	22.31	22.33	21.18		20.84	20.17	21.54	23.01		21.02	21.87	22.06	21.36		21.07	21.49	20.8	21.17		21.51	20.95	21.23
	T1	T2	T3	T4		T1	T2	T3	T4		T1	T2	T3	T4		T1	T2	T3	T4		CK1	CK2
3h-act1	21	22.18	21.94	20.4	6h-act1	21.44	20.21	20.69	22.99	12h-act1	21.32	21.64	22.03	21.78	24h-act1	20	21.32	21.18	20.31	0h-act1	21.08	20.8
3h-act2	21.81	22.28	21.78	21.18	6h-act2	21.04	20.38	20.53	22.78	12h-act2	21.72	21.54	22.05	21.73	24h-act2	21.04	21.51	20.86	20.21	0h-act2	21.24	21.47
3h-act3	21.64	22.31	22.33	21.18	6h-act3	20.84	20.17	21.54	23.01	12h-act3	21.02	21.87	22.06	21.36	24h-act3	21.07	21.49	20.8	21.17	0h-act3	21.51	20.95

## Sheet: 3h
3H CT	T1				T2				T3				T4				CK
	Re1	Re2	Re3	Average	Re1	Re2	Re3	Average	Re1	Re2	Re3	Average	Re1	Re2	Re3	Average	Re1	Re2	Re3	Average
PYL1	26.66	26.36	26.65	26.56	27.79	27.63	27.88	27.7667	28.43	28.24	28.86	28.51	25.71	25.4	25.86	25.6567	29.41	28.315	29.31	29.0117
PYL2	26.53	26.41	26.75	26.5633	27.8	27.41	27.73	27.6467	28.45	28.41	28.55	28.47	25.35	25.42	25.91	25.56	27.85	28.855	29.025	28.5767
PYL3	23.17	23.39	23.54	23.3667	25.55	25.31	25.33	25.3967	25.35	25.29	25.13	25.2567	22.46	22.37	22.47	22.4333	25.255	25.18	25.31	25.2483
PYL4	23.06	23.47	23.95	23.4933	24.71	24.72	24.91	24.78	25.16	24.81	24.55	24.84	22.55	22.88	22.82	22.75	23.155	22.805	23.27	23.0767
PYL5	24.88	25.18	25.44	25.1667	26.35	26.65	26.53	26.51	26.49	26.63	26.86	26.66	24.32	24.2	24.33	24.2833	26.55	26.565	26.455	26.5233
PYL6	24.19	24	23.94	24.0433	25.56	25.62	25.55	25.5767	25.4	25.57	25.32	25.43	23.16	23.54	23.45	23.3833	22.91	22.98	22.945	22.945
PYL7	29.36	28.57	28.82	28.9167	30.45	30.35	29.93	30.2433	30.09	29.91	29.16	29.72	27.52	27.86	27.7	27.6933	29.305	29.01	28.87	29.0617
PYL8	31.39	31.22	30.89	31.1667	32.89	32.22	32.72	32.61	32.73	32.93	32.59	32.75	30.41	30.46	30.46	30.4433	33.33	33.145	33.165	33.2133
PYL9	24.15	24.35	24.67	24.39	26.23	25.44	25.6	25.7567	26.69	26.28	26.27	26.4133	23.98	23.82	24.14	23.98	25.46	25.435	25.705	25.5333
PYL10	28.88	28.64	28.63	28.7167	29.65	29.84	29.58	29.69	29.12	29.49	29.72	29.4433	28.03	28	28.17	28.0667	29.29	29.215	29.03	29.1783
PYL11	29.87	30.55	30.77	30.3967	29.75	29.63	29.83	29.7367	29.96	30.38	29.3	29.88	29.08	29.12	29.06	29.0867	28.35	28.735	28.335	28.4733
PYL12	31.41	31.14	31.39	31.3133	31.32	31.12	31.55	31.33	29.66	29.44	29.78	29.6267	30.34	29.93	29.63	29.9667	31	31.02	30.955	30.9917
PYL13	33.47	33.73	33.14	33.4467	32.25	31.97	32.34	32.1867	32.42	32.29	33.31	32.6733	31.35	31.5	30.79	31.2133	32.74	32.3	32.07	32.37
PYL14	21.81	21.62	21.58	21.67	22.86	22.92	22.73	22.8367	23.07	23.01	22.91	22.9967	21.56	21.47	20.98	21.3367	21.625	21.49	21.57	21.5617
ACT	21	21.81	21.64	21.4833	22.18	22.28	22.31	22.2567	21.94	21.78	22.33	22.0167	20.4	21.18	21.18	20.92	20.94	21.355	21.23	21.18
∆CT	T1			T2			T3			T4			CK
	Re1	Re2	Re3	Re1	Re2	Re3	Re1	Re2	Re3	Re1	Re2	Re3	Re1	Re2	Re3	Average
PYL1	5.18	4.88	5.17	5.53	5.53	5.37	5.62	6.22	6.84	4.79	4.48	4.94	8.23	7.135	8.13	7.83
PYL2	5.05	4.93	5.27	5.54	5.54	5.15	5.47	6.39	6.53	4.43	4.5	4.99	6.67	7.675	7.845	7.4
PYL3	1.69	1.91	2.06	3.29	3.29	3.05	3.07	3.27	3.11	1.54	1.45	1.55	4.075	4	4.13	4.06833
PYL4	1.58	1.99	2.47	2.45	2.45	2.46	2.65	2.79	2.53	1.63	1.96	1.9	1.975	1.625	2.09	1.9
PYL5	3.4	3.7	3.96	4.09	4.09	4.39	4.27	4.61	4.84	3.4	3.28	3.41	5.37	5.385	5.275	5.34
PYL6	2.71	2.52	2.46	3.3	3.3	3.36	3.29	3.55	3.3	2.24	2.62	2.53	1.73	1.8	1.765	1.77
PYL7	7.88	7.09	7.34	8.19	8.19	8.09	7.67	7.89	7.14	6.6	6.94	6.78	8.125	7.83	7.69	7.88
PYL8	9.91	9.74	9.41	10.63	10.63	9.96	10.46	10.91	10.57	9.49	9.54	9.54	12.15	11.965	11.985	12.03
PYL9	2.67	2.87	3.19	3.97	3.97	3.18	3.34	4.26	4.25	3.06	2.9	3.22	4.28	4.255	4.525	4.35
PYL10	7.4	7.16	7.15	7.39	7.58	7.32	7.1	7.47	7.7	7.11	7.08	7.25	8.11	8.035	7.85	8
PYL11	8.39	9.07	9.29	7.49	7.37	7.57	7.94	8.36	7.28	8.16	8.2	8.14	7.17	7.555	7.155	7.29
PYL12	9.93	9.66	9.91	9.06	8.86	9.29	7.64	7.42	7.76	9.42	9.01	8.71	9.82	9.84	9.775	9.81
PYL13	11.99	12.25	11.66	9.99	9.71	10.08	10.4	10.27	11.29	10.43	10.58	9.87	11.56	11.12	10.89	11.19
PYL14	0.33	0.14	0.1	0.6	0.66	0.47	1.05	0.99	0.89	0.64	0.55	0.06	0.445	0.31	0.39	0.38
-∆∆CT	T1 vs CK			T2 vs CK			T3 vs CK			T4 vs CK
	Re1	Re2	Re3	Re1	Re2	Re3	Re1	Re2	Re3	Re1	Re2	Re3
PYL1	2.65	2.95	2.66	2.3	2.46	2.21	1.42	1.61	0.99	3.04	3.35	2.89
PYL2	2.35	2.47	2.13	1.86	2.25	1.93	0.97	1.01	0.87	2.97	2.9	2.41
PYL3	2.38	2.16	2.01	0.78	1.02	1	0.74	0.8	0.96	2.53	2.62	2.52
PYL4	0.32	-0.09	-0.57	-0.55	-0.56	-0.75	-1.24	-0.89	-0.63	0.27	-0.06	0
PYL5	1.94	1.64	1.38	1.25	0.95	1.07	0.87	0.73	0.5	1.94	2.06	1.93
PYL6	-0.94	-0.75	-0.69	-1.53	-1.59	-1.52	-1.61	-1.78	-1.53	-0.47	-0.85	-0.76
PYL7	0	0.79	0.54	-0.31	-0.21	0.21	-0.19	-0.01	0.74	1.28	0.94	1.1
PYL8	2.12	2.29	2.62	1.4	2.07	1.57	1.32	1.12	1.46	2.54	2.49	2.49
PYL9	1.68	1.48	1.16	0.38	1.17	1.01	-0.32	0.09	0.1	1.29	1.45	1.13
PYL10	0.6	0.84	0.85	0.61	0.42	0.68	0.9	0.53	0.3	0.89	0.92	0.75
PYL11	-1.1	-1.78	-2	-0.2	-0.08	-0.28	-0.65	-1.07	0.01	-0.87	-0.91	-0.85
PYL12	-0.12	0.15	-0.1	0.75	0.95	0.52	2.17	2.39	2.05	0.39	0.8	1.1
PYL13	-0.8	-1.06	-0.47	1.2	1.48	1.11	0.79	0.92	-0.1	0.76	0.61	1.32
PYL14	0.05	0.24	0.28	-0.22	-0.28	-0.09	-0.67	-0.61	-0.51	-0.26	-0.17	0.32
2-∆∆CT	T1 vs CK			T2 vs CK			T3 vs CK			T4 vs CK
	Re1	Re2	Re3	Re1	Re2	Re3	Re1	Re2	Re3	Re1	Re2	Re3
PYL1	6.27667	7.72749	6.32033	4.92458	5.50217	4.62675	2.67586	3.05252	1.98618	8.22491	10.1965	7.4127
PYL2	5.09824	5.54044	4.37717	3.63008	4.75683	3.81055	1.95884	2.01391	1.82766	7.83536	7.46426	5.31474
PYL3	1	1.72907	1.45397	1.71713	2.02792	2	0.876606	0.993092	1.67018	2.42839	1.91853	2.14355
PYL4	0.521233	0.594604	0.619854	0.68302	0.678302	0.594604	0.327598	0.291183	0.346277	0.721965	0.554785	0.590496
PYL5	3.83706	3.11666	2.60268	2.37841	1.93187	2.09943	1.82766	1.65864	1.41421	3.83706	4.16986	3.81055
PYL6	1.24833	0.939523	0.673617	0.346277	0.332171	0.348686	0.423373	0.539614	0.646176	1.20581	0.959264	1
PYL7	5.20537	4.46915	4.02782	0.806642	0.864537	1.15669	1.67018	1.7411	1.94531	5.77572	6.1475	5.73582
PYL8	4.34694	4.89056	6.1475	2.63902	4.19887	2.96905	2.49666	2.17347	2.75108	5.81589	5.61778	5.61778
PYL9	3.20428	2.78949	2.23457	1.30134	2.25012	2.01391	0.80107	1.06437	1.07177	2.44528	2.73208	2.18859
PYL10	1.51572	1.79005	1.8025	1.52626	1.33793	1.60214	1.86607	1.44393	1.23114	1.85318	1.89212	1.68179
PYL11	0.466516	0.291183	0.25	0.870551	0.946058	0.823591	0.63728	0.476319	1.00696	0.547147	0.532185	0.554785
PYL12	0.920188	1.10957	0.933033	1.68179	1.93187	1.43396	4.50023	5.24157	4.14106	1.31039	1.7411	2.14355
PYL13	0.574349	0.479632	0.721965	2.2974	2.78949	2.15846	1.72907	1.89212	0.933033	1.69349	1.52626	2.49666
PYL14	1.03526	1.18099	1.21419	0.858565	0.823591	0.939523	0.628507	0.655197	0.702222	0.835088	0.888843	1.24833

## Sheet: 6h
6H CT	T1				T2				T3				T4				CK
	Re1	Re2	Re3	Average	Re1	Re2	Re3	Average	Re1	Re2	Re3	Average	Re1	Re2	Re3	Average	Re1	Re2	Re3	Average
PYL1	26.46	26.28	26.26	26.3333	25.09	24.91	25.1	25.0333	27.04	26.95	26.68	26.89	26.89	27.12	27.24	27.0833	29.41	28.315	29.31	29.0117
PYL2	26.42	26.17	26.54	26.3767	24.85	24.98	25.24	25.0233	26.97	27.06	26.86	26.9633	27.3	27.51	26.78	27.1967	27.85	28.855	29.025	28.5767
PYL3	24.11	23.77	23.93	23.9367	22.8	23.14	22.84	22.9267	23.74	23.61	23.6	23.65	24.42	24.5	24.35	24.4233	25.255	25.18	25.31	25.2483
PYL4	23.4	23.17	23.44	23.3367	22.59	22.61	22.43	22.5433	23.6	23.17	23.4	23.39	24.78	25.37	25.04	25.0633	23.155	22.805	23.27	23.0767
PYL5	24.93	24.96	24.64	24.8433	23.42	23.47	23.22	23.37	24.08	24.17	24.02	24.09	26.87	26.26	26.16	26.43	26.55	26.565	26.455	26.5233
PYL6	23.97	23.8	23.82	23.8633	21.99	22.08	22.02	22.03	23.29	23.19	23.11	23.1967	25.25	25.06	25.37	25.2267	22.91	22.98	22.945	22.945
PYL7	29.57	29.09	29.18	29.28	27.17	27.21	27.49	27.29	27.76	27.79	27.94	27.83	29.04	29.31	29.52	29.29	29.305	29.01	28.87	29.0617
PYL8	29.69	29.07	29.53	29.43	27.15	26.93	27.24	27.1067	28.21	28.28	28.55	28.3467	31.31	31.67	31.29	31.4233	33.33	33.145	33.165	33.2133
PYL9	24.27	24.03	24.1	24.1333	23.04	22.73	23.22	22.9967	24.11	23.95	24.32	24.1267	24.76	25.21	25.16	25.0433	25.46	25.435	25.705	25.5333
PYL10	26.93	26.86	27.62	27.1367	26.04	26.05	25.89	25.9933	27.5	26.88	27.08	27.1533	27.82	27.72	27.88	27.8067	29.29	29.215	29.03	29.1783
PYL11	29.12	29.23	29.31	29.22	28.12	27.83	27.68	27.8767	30.48	29.89	30.54	30.3033	30.63	31.25	31.34	31.0733	28.35	28.735	28.335	28.4733
PYL12	29.71	29.14	29.36	29.4033	28.97	28.95	28.25	28.7233	28.08	28.11	28.24	28.1433	30.86	30.83	30.95	30.88	31	31.02	30.955	30.9917
PYL13	32.63	32.84	32.43	32.6333	30.76	30.96	30.46	30.7267	31.13	31.08	30.21	30.8067	32.69	32.23	32.72	32.5467	32.74	32.3	32.07	32.37
PYL14	21.54	21.74	21.25	21.51	20.47	20.33	20.72	20.5067	20.75	20.78	19.61	20.38	22.95	22.67	22.38	22.6667	21.625	21.49	21.57	21.5617
ACT	21.44	21.04	20.84	21.1067	20.21	20.38	20.17	20.2533	20.69	20.53	21.54	20.92	22.99	22.78	23.01	22.9267	20.94	21.355	21.23	21.18
∆CT	T1			T2			T3			T4			CK
	Re1	Re2	Re3	Re1	Re2	Re3	Re1	Re2	Re3	Re1	Re2	Re3	Re1	Re2	Re3	Average
PYL1	5.35	5.17	5.15	4.83667	4.65667	4.84667	6.12	6.03	5.76	3.96	4.19	4.31	8.23	7.135	8.13	7.83
PYL2	5.31	5.06	5.43	4.59667	4.72667	4.98667	6.05	6.14	5.94	4.37	4.58	3.85	6.67	7.675	7.845	7.4
PYL3	3	2.66	2.82	2.54667	2.88667	2.58667	2.82	2.69	2.68	1.49	1.57	1.42	4.075	4	4.13	4.06833
PYL4	2.29	2.06	2.33	2.33667	2.35667	2.26	2.68	2.25	2.48	1.85	2.44	2.11	1.975	1.625	2.09	1.9
PYL5	3.82	3.85	3.53	3.16667	3.21667	2.96667	3.16	3.25	3.1	3.94	3.33	3.23	5.37	5.385	5.275	5.34
PYL6	2.86	2.69	2.71	1.73667	1.82667	1.76667	2.37	2.27	2.19	2.32	2.13	2.44	1.73	1.8	1.765	1.77
PYL7	8.46	7.98	8.07	6.91667	6.95667	7.23667	6.84	6.87	7.02	6.11	6.38	6.59	8.125	7.83	7.69	7.88
PYL8	8.58	7.96	8.42	6.89667	6.67667	6.98667	7.29	7.36	7.63	8.38	8.74	8.36	12.15	11.965	11.985	12.03
PYL9	3.16	2.92	2.99	2.78667	2.47667	2.96667	3.19	3.03	3.4	1.83	2.28	2.23	4.28	4.255	4.525	4.35
PYL10	5.82	5.75	6.51	5.78667	5.79667	5.63667	6.58	5.96	6.16	4.89	4.79	4.95	8.11	8.035	7.85	8
PYL11	8.01	8.12	8.2	7.86667	8.1	7.95	9.56	8.97	9.62	7.7	8.32	8.41	7.17	7.555	7.155	7.29
PYL12	8.6	8.03	8.25	8.71667	8.69667	7.99667	7.16	7.19	7.32	7.93	7.9	8.02	9.82	9.84	9.775	9.81
PYL13	11.52	11.73	11.32	10.5067	10.7067	10.2067	10.21	10.16	9.29	9.76	9.3	9.79	11.56	11.12	10.89	11.19
PYL14	0.43	0.63	0.14	0.216667	0.0766667	0.466667	-0.17	-0.14	-0.31	0.02	-0.26	-0.55	0.445	0.31	0.39	0.38
-∆∆CT	T1 vs CK			T2 vs CK			T3 vs CK			T4 vs CK
	Re1	Re2	Re3	Re1	Re2	Re3	Re1	Re2	Re3	Re1	Re2	Re3
PYL1	2.48	2.66	2.68	2.99333	3.17333	2.98333	1.71	1.8	2.07	3.87	3.64	3.52
PYL2	2.09	2.34	1.97	2.80333	2.67333	2.41333	1.35	1.26	1.46	3.03	2.82	3.55
PYL3	1.07	1.41	1.25	1.52333	1.18333	1.48333	1.25	1.38	1.39	2.58	2.5	2.65
PYL4	-0.39	-0.16	-0.43	-0.436667	-0.456667	-0.36	-0.78	-0.35	-0.58	0.05	-0.54	-0.21
PYL5	1.52	1.49	1.81	2.17333	2.12333	2.37333	2.18	2.09	2.24	1.4	2.01	2.11
PYL6	-1.09	-0.92	-0.94	0.0333333	-0.0566667	0.00333333	-0.6	-0.5	-0.42	-0.55	-0.36	-0.67
PYL7	-0.58	-0.1	-0.19	0.963333	0.923333	0.643333	1.04	1.01	0.86	1.77	1.5	1.29
PYL8	3.45	4.07	3.61	5.13333	5.35333	5.04333	4.74	4.67	4.4	3.65	3.29	3.67
PYL9	1.19	1.43	1.36	1.56333	1.87333	1.38333	1.16	1.32	0.95	2.52	2.07	2.12
PYL10	2.18	2.25	1.49	2.21333	2.20333	2.36333	1.42	2.04	1.84	3.11	3.21	3.05
PYL11	-0.72	-0.83	-0.91	-0.576667	-0.81	-0.66	-2.27	-1.68	-2.33	-0.41	-1.03	-1.12
PYL12	1.21	1.78	1.56	1.09333	1.11333	1.81333	2.65	2.62	2.49	1.88	1.91	1.79
PYL13	-0.33	-0.54	-0.13	0.683333	0.483333	0.983333	0.98	1.03	1.9	1.43	1.89	1.4
PYL14	-0.05	-0.25	0.24	0.163333	0.303333	-0.0866667	0.55	0.52	0.69	0.36	0.64	0.93
2-∆∆CT	T1 vs CK			T2 vs CK			T3 vs CK			T4 vs CK
	Re1	Re2	Re3	Re1	Re2	Re3	Re1	Re2	Re3	Re1	Re2	Re3
PYL1	5.57897	6.32033	6.40856	7.96312	9.02129	7.90811	3.27161	3.4822	4.19887	14.6213	12.4666	11.4716
PYL2	4.25748	5.06303	3.91768	6.98051	6.37901	5.32704	2.54912	2.39496	2.75108	8.1681	7.06162	11.7127
PYL3	2.09943	2.65737	2.37841	2.87454	2.27101	2.79594	2.37841	2.60268	2.62079	5.9794	5.65685	6.27667
PYL4	0.76313	0.895025	0.742262	0.73884	0.728668	0.779165	0.582367	0.784584	0.668964	1.03526	0.687771	0.864537
PYL5	2.86791	2.80889	3.50642	4.51064	4.35699	5.18137	4.53154	4.25748	4.72397	2.63902	4.02782	4.31691
PYL6	0.469761	0.528509	0.521233	1.02337	0.961483	1.00231	0.659754	0.707107	0.747425	0.68302	0.779165	0.628507
PYL7	0.668964	0.933033	0.876606	1.94981	1.89649	1.56193	2.05623	2.01391	1.81504	3.41054	2.82843	2.44528
PYL8	10.9283	16.7955	12.2101	35.0984	40.8803	32.9757	26.7228	25.4572	21.1121	12.5533	9.78112	12.7286
PYL9	2.28153	2.69447	2.56685	2.95536	3.66378	2.6087	2.23457	2.49666	1.93187	5.73582	4.19887	4.34694
PYL10	4.53154	4.75683	2.80889	4.63746	4.60542	5.14558	2.67586	4.11246	3.5801	8.63383	9.25351	8.28212
PYL11	0.607097	0.562529	0.532185	0.670511	0.570382	0.632878	0.20733	0.312083	0.198884	0.752623	0.48971	0.460094
PYL12	2.31338	3.43426	2.94854	2.13366	2.16345	3.51453	6.27667	6.1475	5.61778	3.68075	3.75809	3.45815
PYL13	0.795536	0.687771	0.913831	1.60585	1.39797	1.97703	1.97247	2.04202	3.73213	2.69447	3.70635	2.63902
PYL14	0.965936	0.840896	1.18099	1.11987	1.23399	0.941696	1.46409	1.43396	1.61328	1.28343	1.55833	1.90528

## Sheet: 12h
12H CT	T1				T2				T3				T4				CK
	Re1	Re2	Re3	Average	Re1	Re2	Re3	Average	Re1	Re2	Re3	Average	Re1	Re2	Re3	Average	Re1	Re2	Re3	Average
PYL1	26.49	26.84	27.43	26.92	27.02	27.15	27	27.0567	27.65	28.26	27.87	27.9267	27.03	26.84	26.66	26.8433	29.41	28.315	29.31	29.0117
PYL2	26.69	26.61	26.89	26.73	26.95	26.61	26.8	26.7867	27.65	27.8	27.78	27.7433	26.6	26.74	26.75	26.6967	27.85	28.855	29.025	28.5767
PYL3	24.96	24.73	24.56	24.75	27.47	27.37	27.26	27.3667	26.17	26.14	26.17	26.16	24.53	24.51	25.08	24.7067	25.255	25.18	25.31	25.2483
PYL4	22.18	22.53	22.36	22.3567	22.61	22.67	23.47	22.9167	23.13	22.94	22.84	22.97	22.72	22.64	22.32	22.56	23.155	22.805	23.27	23.0767
PYL5	23.01	22.96	23.04	23.0033	23.42	23.43	23.34	23.3967	24.08	24.23	24.31	24.2067	23.28	23.15	23.08	23.17	26.55	26.565	26.455	26.5233
PYL6	21.23	21.21	21.08	21.1733	22.06	21.92	22.01	21.9967	22.65	22.7	22.91	22.7533	21.93	21.97	22.25	22.05	22.91	22.98	22.945	22.945
PYL7	26.24	25.94	26.13	26.1033	26.85	27.09	27.09	27.01	28	27.98	27.61	27.8633	26.11	26.07	25.99	26.0567	29.305	29.01	28.87	29.0617
PYL8	28.21	28.35	28.28	28.28	29.08	29.08	29.17	29.11	29.53	29.39	29.56	29.4933	27.83	27.95	27.91	27.8967	33.33	33.145	33.165	33.2133
PYL9	24.03	23.62	24.09	23.9133	24.65	24.48	24.48	24.5367	25.29	25.02	25	25.1033	24.13	23.82	24.06	24.0033	25.46	25.435	25.705	25.5333
PYL10	26.46	26.11	25.94	26.17	26.77	26.69	26.55	26.67	26.65	27.01	26.53	26.73	26.27	26.29	26.2	26.2533	29.29	29.215	29.03	29.1783
PYL11	29.85	29.87	29.93	29.8833	29.26	29.69	29.05	29.3333	29.4	29.12	28.95	29.1567	30.2	30.31	30.01	30.1733	28.35	28.735	28.335	28.4733
PYL12	29.03	29.36	29.17	29.1867	29.22	28.96	29.12	29.1	31.78	31.87	31.85	31.8333	30.22	29.96	30.27	30.15	31	31.02	30.955	30.9917
PYL13	32.34	31.38	31.37	31.6967	30.55	30.85	31.23	30.8767	31.53	32.88	31.92	32.11	31.38	31.04	30.78	31.0667	32.74	32.3	32.07	32.37
PYL14	22.08	22.54	21.64	22.0867	22.52	22.56	22.5	22.5267	22.13	22.08	21.87	22.0267	22.25	21.99	22.08	22.1067	21.625	21.49	21.57	21.5617
ACT	21.32	21.72	21.02	21.3533	21.64	21.54	21.87	21.6833	22.03	22.05	22.06	22.0467	21.78	21.73	21.36	21.6233	20.94	21.355	21.23	21.18
∆CT	T1			T2			T3			T4			CK
	Re1	Re2	Re3	Re1	Re2	Re3	Re1	Re2	Re3	Re1	Re2	Re3	Re1	Re2	Re3	Average
PYL1	5.14	5.49	6.08	5.34	5.47	5.32	5.6	6.21	5.82	5.41	5.22	5.04	8.23	7.135	8.13	7.83
PYL2	5.34	5.26	5.54	5.27	4.93	5.12	5.6	5.75	5.73	4.98	5.12	5.13	6.67	7.675	7.845	7.4
PYL3	3.61	3.38	3.21	5.79	5.69	5.58	4.12	4.09	4.12	2.91	2.89	3.46	4.075	4	4.13	4.06833
PYL4	0.83	1.18	1.01	0.93	0.99	1.79	1.08	0.89	0.79	1.1	1.02	0.7	1.975	1.625	2.09	1.9
PYL5	1.66	1.61	1.69	1.74	1.75	1.66	2.03	2.18	2.26	1.66	1.53	1.46	5.37	5.385	5.275	5.34
PYL6	-0.12	-0.14	-0.27	0.38	0.24	0.33	0.6	0.65	0.86	0.31	0.35	0.63	1.73	1.8	1.765	1.77
PYL7	4.89	4.59	4.78	5.17	5.41	5.41	5.95	5.93	5.56	4.49	4.45	4.37	8.125	7.83	7.69	7.88
PYL8	6.86	7	6.93	7.4	7.4	7.49	7.48	7.34	7.51	6.21	6.33	6.29	12.15	11.965	11.985	12.03
PYL9	2.68	2.27	2.74	2.97	2.8	2.8	3.24	2.97	2.95	2.51	2.2	2.44	4.28	4.255	4.525	4.35
PYL10	5.11	4.76	4.59	5.09	5.01	4.87	4.6	4.96	4.48	4.65	4.67	4.58	8.11	8.035	7.85	8
PYL11	8.5	8.52	8.58	7.58	8.01	7.37	7.35	7.07	6.9	8.58	8.69	8.39	7.17	7.555	7.155	7.29
PYL12	7.68	8.01	7.82	7.54	7.28	7.44	9.73	9.82	9.8	8.6	8.34	8.65	9.82	9.84	9.775	9.81
PYL13	10.99	10.03	10.02	8.87	9.17	9.55	9.48	10.83	9.87	9.76	9.42	9.16	11.56	11.12	10.89	11.19
PYL14	0.73	1.19	0.29	0.84	0.88	0.82	0.08	0.03	-0.18	0.63	0.37	0.46	0.445	0.31	0.39	0.38
-∆∆CT	T1 vs CK			T2 vs CK			T3 vs CK			T4 vs CK
	Re1	Re2	Re3	Re1	Re2	Re3	Re1	Re2	Re3	Re1	Re2	Re3
PYL1	2.69	2.34	1.75	2.49	2.36	2.51	2.23	1.62	2.01	2.42	2.61	2.79
PYL2	2.06	2.14	1.86	2.13	2.47	2.28	1.8	1.65	1.67	2.42	2.28	2.27
PYL3	0.46	0.69	0.86	-1.72	-1.62	-1.51	-0.05	-0.02	-0.05	1.16	1.18	0.61
PYL4	1.07	0.72	0.89	0.97	0.91	0.11	0.82	1.01	1.11	0.8	0.88	1.2
PYL5	3.68	3.73	3.65	3.6	3.59	3.68	3.31	3.16	3.08	3.68	3.81	3.88
PYL6	1.89	1.91	2.04	1.39	1.53	1.44	1.17	1.12	0.91	1.46	1.42	1.14
PYL7	2.99	3.29	3.1	2.71	2.47	2.47	1.93	1.95	2.32	3.39	3.43	3.51
PYL8	5.17	5.03	5.1	4.63	4.63	4.54	4.55	4.69	4.52	5.82	5.7	5.74
PYL9	1.67	2.08	1.61	1.38	1.55	1.55	1.11	1.38	1.4	1.84	2.15	1.91
PYL10	2.89	3.24	3.41	2.91	2.99	3.13	3.4	3.04	3.52	3.35	3.33	3.42
PYL11	-1.21	-1.23	-1.29	-0.29	-0.72	-0.08	-0.06	0.22	0.39	-1.29	-1.4	-1.1
PYL12	2.13	1.8	1.99	2.27	2.53	2.37	0.08	-0.01	0.01	1.21	1.47	1.16
PYL13	0.2	1.16	1.17	2.32	2.02	1.64	1.71	0.36	1.32	1.43	1.77	2.03
PYL14	-0.35	-0.81	0.09	-0.46	-0.5	-0.44	0.3	0.35	0.56	-0.25	0.01	-0.08
2-∆∆CT	T1 vs CK			T2 vs CK			T3 vs CK			T4 vs CK
	Re1	Re2	Re3	Re1	Re2	Re3	Re1	Re2	Re3	Re1	Re2	Re3
PYL1	6.45313	5.06303	3.36359	5.61778	5.1337	5.6962	4.69134	3.07375	4.02782	5.35171	6.10504	6.9163
PYL2	4.16986	4.40762	3.63008	4.37717	5.54044	4.85678	3.4822	3.13834	3.18215	5.35171	4.85678	4.82323
PYL3	1.37554	1.61328	1.81504	0.303549	0.325335	0.351111	0.965936	0.986233	0.965936	2.23457	2.26577	1.52626
PYL4	2.09943	1.64718	1.85318	1.95884	1.87905	1.07923	1.76541	2.01391	2.15846	1.7411	1.84038	2.2974
PYL5	12.8171	13.2691	12.5533	12.1257	12.042	12.8171	9.91766	8.9383	8.45614	12.8171	14.0257	14.723
PYL6	3.70635	3.75809	4.11246	2.62079	2.88786	2.71321	2.25012	2.17347	1.87905	2.75108	2.67586	2.20381
PYL7	7.94474	9.78112	8.57419	6.54322	5.54044	5.54044	3.81055	3.86375	4.99332	10.4831	10.7779	11.3924
PYL8	36.0019	32.6724	34.2968	24.761	24.761	23.2636	23.4254	25.8125	22.9433	56.493	51.9842	53.4456
PYL9	3.18215	4.22807	3.05252	2.60268	2.92817	2.92817	2.15846	2.60268	2.63902	3.5801	4.43828	3.75809
PYL10	7.4127	9.44794	10.6295	7.51618	7.94474	8.75435	10.5561	8.22491	11.4716	10.1965	10.0561	10.7034
PYL11	0.432269	0.426317	0.408951	0.817902	0.607097	0.946058	0.959264	1.16473	1.31039	0.408951	0.378929	0.466516
PYL12	4.37717	3.4822	3.97237	4.82323	5.77572	5.16941	1.05702	0.993092	1.00696	2.31338	2.77022	2.23457
PYL13	1.1487	2.23457	2.25012	4.99332	4.05584	3.11666	3.27161	1.28343	2.49666	2.69447	3.41054	4.08405
PYL14	0.784584	0.570382	1.06437	0.726986	0.707107	0.737135	1.23114	1.27456	1.47427	0.840896	1.00696	0.946058

## Sheet: 24h
24H CT	T1				T2				T3				T4				CK
	Re1	Re2	Re3	Average	Re1	Re2	Re3	Average	Re1	Re2	Re3	Average	Re1	Re2	Re3	Average	Re1	Re2	Re3	Average
PYL1	28.74	28.36	28.49	28.53	28.21	27.78	28.05	28.0133	27.79	27.81	28.12	27.9067	26	25.76	25.97	25.91	29.41	28.315	29.31	29.0117
PYL2	28.47	28.02	28.51	28.3333	27.47	27.83	27.79	27.6967	27.66	28.09	27.73	27.8267	26.18	25.94	25.95	26.0233	27.85	28.855	29.025	28.5767
PYL3	24.69	25.08	24.51	24.76	26.21	26.33	26.17	26.2367	24.25	24.12	23.94	24.1033	23.44	23.47	23.2	23.37	25.255	25.18	25.31	25.2483
PYL4	23.74	24.1	23.79	23.8767	23.66	23.73	23.54	23.6433	23.84	23.38	23.24	23.4867	23.97	23.19	23.2	23.4533	23.155	22.805	23.27	23.0767
PYL5	25.66	25.71	25.69	25.6867	24.38	24.96	24.79	24.71	26.18	26.07	26.18	26.1433	24.82	24.57	24.34	24.5767	26.55	26.565	26.455	26.5233
PYL6	23.3	23.36	23.41	23.3567	22.79	22.83	23.12	22.9133	23.46	23.16	23.1	23.24	22.41	22.43	22.26	22.3667	22.91	22.98	22.945	22.945
PYL7	29.89	29.97	30.36	30.0733	28.21	29.1	28.32	28.5433	29.55	29.32	29.8	29.5567	28.35	28.15	28.11	28.2033	29.305	29.01	28.87	29.0617
PYL8	33.07	33.11	32.95	33.0433	29.23	29.61	29.38	29.4067	30.18	30.43	30.23	30.28	32.31	32.36	32.49	32.3867	33.33	33.145	33.165	33.2133
PYL9	24.5	24.28	24.99	24.59	23.21	23.07	23.15	23.1433	23.76	23.76	23.42	23.6467	24.37	24.18	24.14	24.23	25.46	25.435	25.705	25.5333
PYL10	28.53	28.04	28.24	28.27	27.34	27.51	27.28	27.3767	28.5	28.43	29.04	28.6567	28.48	28.76	28.89	28.71	29.29	29.215	29.03	29.1783
PYL11	27.88	27.94	28.05	27.9567	28.04	27.83	27.75	27.8733	27.56	27.2	27.92	27.56	28.98	28.94	28.62	28.8467	28.35	28.735	28.335	28.4733
PYL12	29.97	30.08	30.47	30.1733	29.29	29.46	28.96	29.2367	31.65	31.57	30.86	31.36	30.56	30.47	30.83	30.62	31	31.02	30.955	30.9917
PYL13	30.22	30.84	30.41	30.49	29.58	29.67	29.82	29.69	30.92	31.79	31.75	31.4867	30.08	30.8	31.15	30.6767	32.74	32.3	32.07	32.37
PYL14	22.08	22.25	22.49	22.2733	22.21	22.33	22.53	22.3567	20.98	20.96	20.89	20.9433	21.36	21.29	20.9	21.1833	21.625	21.49	21.57	21.5617
ACT	20	21.04	21.07	20.7033	21.32	21.51	21.49	21.44	21.18	20.86	20.8	20.9467	20.31	20.21	21.17	20.5633	20.94	21.355	21.23	21.18
∆CT	T1			T2			T3			T4			CK
	Re1	Re2	Re3	Re1	Re2	Re3	Re1	Re2	Re3	Re1	Re2	Re3	Re1	Re2	Re3	Average
PYL1	8.04	7.66	7.79	6.77	6.27	6.61	6.84	6.86	7.17	5.44	5.2	5.41	8.23	7.135	8.13	7.83
PYL2	7.77	7.32	7.81	6.03	6.39	6.35	6.71	7.14	6.78	5.62	5.38	5.39	6.67	7.675	7.845	7.4
PYL3	3.99	4.38	3.81	4.77	4.89	4.73	3.3	3.17	2.99	2.88	2.91	2.64	4.075	4	4.13	4.06833
PYL4	3.04	3.4	3.09	2.22	2.29	2.1	2.89	2.43	2.29	3.41	2.63	2.64	1.975	1.625	2.09	1.9
PYL5	4.96	5.01	4.99	2.94	3.45	3.35	5.23	5.12	5.23	4.26	4.01	3.78	5.37	5.385	5.275	5.34
PYL6	2.6	2.66	2.71	1.35	1.39	1.68	2.51	2.21	2.15	1.85	1.87	1.7	1.73	1.8	1.765	1.77
PYL7	9.19	9.27	9.66	6.77	7.66	6.88	8.6	8.37	8.85	7.79	7.59	7.55	8.125	7.83	7.69	7.88
PYL8	12.37	12.41	12.25	7.79	8.17	7.94	9.23	9.48	9.28	11.75	11.8	11.93	12.15	11.965	11.985	12.03
PYL9	3.8	3.58	4.29	1.77	1.63	1.71	2.81	2.81	2.47	3.81	3.62	3.58	4.28	4.255	4.525	4.35
PYL10	7.83	7.34	7.54	5.9	6.07	5.84	7.55	7.48	8.09	7.92	8.2	8.33	8.11	8.035	7.85	8
PYL11	7.18	7.24	7.35	6.6	6.39	6.31	6.61	6.25	6.97	8.42	8.38	8.06	7.17	7.555	7.155	7.29
PYL12	9.27	9.38	9.77	7.85	8.02	7.52	10.7	10.62	9.91	10	9.91	10.27	9.82	9.84	9.775	9.81
PYL13	9.52	10.14	9.71	8.14	8.23	8.38	9.97	10.84	10.8	9.52	10.24	10.59	11.56	11.12	10.89	11.19
PYL14	1.38	1.55	1.79	0.77	0.82	1.09	0.03	0.01	-0.06	0.8	0.73	0.34	0.445	0.31	0.39	0.38
-∆∆CT	T1 vs CK			T2 vs CK			T3 vs CK			T4 vs CK
	Re1	Re2	Re3	Re1	Re2	Re3	Re1	Re2	Re3	Re1	Re2	Re3
PYL1	-0.21	0.17	0.04	1.06	1.56	1.22	0.99	0.97	0.66	2.39	2.63	2.42
PYL2	-0.37	0.08	-0.41	1.37	1.01	1.05	0.69	0.26	0.62	1.78	2.02	2.01
PYL3	0.08	-0.31	0.26	-0.7	-0.82	-0.66	0.77	0.9	1.08	1.19	1.16	1.43
PYL4	-1.14	-1.5	-1.19	-0.32	-0.39	-0.2	-0.99	-0.53	-0.39	-1.51	-0.73	-0.74
PYL5	0.38	0.33	0.35	2.4	1.89	1.99	0.11	0.22	0.11	1.08	1.33	1.56
PYL6	-0.83	-0.89	-0.94	0.42	0.38	0.09	-0.74	-0.44	-0.38	-0.08	-0.1	0.07
PYL7	-1.31	-1.39	-1.78	1.11	0.22	1	-0.72	-0.49	-0.97	0.09	0.29	0.33
PYL8	-0.34	-0.38	-0.22	4.24	3.86	4.09	2.8	2.55	2.75	0.28	0.23	0.1
PYL9	0.55	0.77	0.06	2.58	2.72	2.64	1.54	1.54	1.88	0.54	0.73	0.77
PYL10	0.17	0.66	0.46	2.1	1.93	2.16	0.45	0.52	-0.09	0.08	-0.2	-0.33
PYL11	0.11	0.05	-0.06	0.69	0.9	0.98	0.68	1.04	0.32	-1.13	-1.09	-0.77
PYL12	0.54	0.43	0.04	1.96	1.79	2.29	-0.89	-0.81	-0.1	-0.19	-0.1	-0.46
PYL13	1.67	1.05	1.48	3.05	2.96	2.81	1.22	0.35	0.39	1.67	0.95	0.6
PYL14	-1	-1.17	-1.41	-0.39	-0.44	-0.71	0.35	0.37	0.44	-0.42	-0.35	0.04
2-∆∆CT	T1 vs CK			T2 vs CK			T3 vs CK			T4 vs CK
	Re1	Re2	Re3	Re1	Re2	Re3	Re1	Re2	Re3	Re1	Re2	Re3
PYL1	0.864537	1.12506	1.02811	2.08493	2.94854	2.32947	1.98618	1.95884	1.58008	5.24157	6.19026	5.35171
PYL2	0.773782	1.05702	0.752623	2.58471	2.01391	2.07053	1.61328	1.19748	1.53688	3.43426	4.05584	4.02782
PYL3	1.05702	0.806642	1.19748	0.615572	0.566442	0.632878	1.70527	1.86607	2.11404	2.28153	2.23457	2.69447
PYL4	0.45376	0.353553	0.438303	0.80107	0.76313	0.870551	0.503478	0.692555	0.76313	0.351111	0.602904	0.598739
PYL5	1.30134	1.25701	1.27456	5.27803	3.70635	3.97237	1.07923	1.16473	1.07923	2.11404	2.51403	2.94854
PYL6	0.562529	0.539614	0.521233	1.33793	1.30134	1.06437	0.598739	0.737135	0.768438	0.946058	0.933033	1.04972
PYL7	0.403321	0.381565	0.291183	2.15846	1.16473	2	0.607097	0.712025	0.510506	1.06437	1.22264	1.25701
PYL8	0.790041	0.768438	0.858565	18.8959	14.5203	17.0299	6.9644	5.85634	6.72717	1.21419	1.17283	1.07177
PYL9	1.46409	1.70527	1.04247	5.9794	6.58873	6.23332	2.90795	2.90795	3.68075	1.45397	1.65864	1.70527
PYL10	1.12506	1.58008	1.37554	4.28709	3.81055	4.46915	1.36604	1.43396	0.939523	1.05702	0.870551	0.795536
PYL11	1.07923	1.03526	0.959264	1.61328	1.86607	1.97247	1.60214	2.05623	1.24833	0.456916	0.469761	0.586417
PYL12	1.45397	1.34723	1.02811	3.89062	3.45815	4.89056	0.539614	0.570382	0.933033	0.876606	0.933033	0.726986
PYL13	3.18215	2.07053	2.78949	8.28212	7.78124	7.01285	2.32947	1.27456	1.31039	3.18215	1.93187	1.51572
PYL14	0.5	0.444421	0.376312	0.76313	0.737135	0.61132	1.27456	1.29235	1.3566	0.747425	0.784584	1.02811

## Sheet: P value
T1	2-∆∆CT value					T1							T2	2-∆∆CT value					T2
	0H	3H	6H	12H	24H	PYL1	0H	3H	6H	12H	24H			0H	3H	6H	12H	24H	PYL1	0H	3H	6H	12H	24H
PYL1	0.757858	6.27667	5.57897	6.45313	0.864537	Average (2-∆∆CT)	1.0633	6.7767	6.1033	4.9567	1.0067		PYL1	0.757858	4.92458	7.96312	5.61778	2.08493	Average (2-∆∆CT)	1.0633	5.0167	8.2967	5.4833	2.4533
PYL1	1.61888	7.72749	6.32033	5.06303	1.12506	SE	0.27871	0.47681	0.26295	0.8935	0.07881		PYL1	1.61888	5.50217	9.02129	5.1337	2.94854	SE	0.27871	0.25576	0.36195	0.17817	0.25861
PYL1	0.812252	6.32033	6.40856	3.36359	1.02811	P value		0.000491819	0.000192696	0.0140931	0.852811		PYL1	0.812252	4.62675	7.90811	5.6962	2.32947	P value		0.000475821	9.29327e-05	0.000178272	0.0213495
								**	**	**											**	**	**	*
						PYL2	0H	3H	6H	12H	24H								PYL2	0H	3H	6H	12H	24H
PYL2	1.65864	5.09824	4.25748	4.16986	0.773782	Average (2-∆∆CT)	1.0733	5.0067	4.4133	4.07	0.86		PYL2	1.65864	3.63008	6.98051	4.37717	2.58471	Average (2-∆∆CT)	1.0733	4.0667	6.23	4.9267	2.22
PYL2	0.82645	5.54044	5.06303	4.40762	1.05702	SE	0.29475	0.3381	0.3379	0.23065	0.10017		PYL2	0.82645	4.75683	6.37901	5.54044	2.01391	SE	0.29475	0.35054	0.48218	0.33652	0.18083
PYL2	0.734584	4.37717	3.91768	3.63008	0.752623	P value		0.000934539	0.00174704	0.00130688	0.531284		PYL2	0.734584	3.81055	5.32704	4.85678	2.07053	P value		0.00280208	0.00080326	0.00100197	0.0291511
								**	**	**											**	**	**	*
						PYL3	0H	3H	6H	12H	24H								PYL3	0H	3H	6H	12H	24H
PYL3	0.99654	5.20537	2.09943	1.37554	1.05702	Average (2-∆∆CT)	1.0033	4.57	2.38	1.6033	1.0233		PYL3	0.99654	1.71713	2.87454	0.303549	0.615572	Average (2-∆∆CT)	1.0033	1.9167	2.6467	0.3267	0.6067
PYL3	1.04972	4.46915	2.65737	1.61328	0.806642	SE	0.02603	0.34429	0.16166	0.12706	0.11407		PYL3	1.04972	2.02792	2.27101	0.325335	0.566442	SE	0.02603	0.09871	0.18941	0.01453	0.01856
PYL3	0.959264	4.02782	2.37841	1.81504	1.19748	P value		0.000491636	0.00108163	0.00986687	0.882053		PYL3	0.959264	2	2.79594	0.351111	0.632878	P value		0.000883389	0.00100327	2.19638e-05	0.000271976
								**	**	**											**	**	**	**
						PYL4	0H	3H	6H	12H	24H								PYL4	0H	3H	6H	12H	24H
PYL4	0.947151	1.24833	0.76313	2.09943	0.45376	Average (2-∆∆CT)	1.01	0.9533	0.8	1.8667	0.4133		PYL4	0.957224	0.68302	0.73884	1.95884	0.80107	Average (2-∆∆CT)	0.9567	0.65	0.75	1.64	0.81
PYL4	1.2072	0.939523	0.895025	1.64718	0.353553	SE	0.10263	0.16756	0.05033	0.13017	0.0318		PYL4	0.922004	0.678302	0.728668	1.87905	0.76313	SE	0.02028	0.03	0.01528	0.28095	0.03215
PYL4	0.874583	0.673617	0.742262	1.85318	0.438303	P value		0.788206	0.134031	0.00657049	0.00491084		PYL4	0.988388	0.594604	0.779165	1.07923	0.870551	P value		0.000919656	0.00109327	0.0722275	0.0172915
										**	**										**	**		*
						PYL5	0H	3H	6H	12H	24H								PYL5	0H	3H	6H	12H	24H
PYL5	0.97942	3.83706	2.86791	12.8171	1.30134	Average (2-∆∆CT)	1	3.1867	3.0633	12.88	1.2767		PYL5	0.97942	2.37841	4.51064	12.1257	5.27803	Average (2-∆∆CT)	1	2.1367	4.6833	12.33	4.32
PYL5	0.96929	3.11666	2.80889	13.2691	1.25701	SE	0.02517	0.35951	0.224	0.21	0.01202		PYL5	0.96929	1.93187	4.35699	12.042	3.70635	SE	0.02517	0.13119	0.25208	0.24637	0.48583
PYL5	1.04608	2.60268	3.50642	12.5533	1.27456	P value		0.00366306	0.000780798	5.88473e-07	0.000515363		PYL5	1.04608	2.09943	5.18137	12.8171	3.97237	P value		0.00100703	0.000131785	1.34645e-06	0.00240478
								**	**	**	**										**	**	**	**
						PYL6	0H	3H	6H	12H	24H								PYL6	0H	3H	6H	12H	24H
PYL6	1.02811	0.521233	0.469761	3.70635	0.562529	Average (2-∆∆CT)	1.0033	0.5767	0.5067	3.86	0.54		PYL6	1.02811	0.346277	1.02337	2.62079	1.33793	Average (2-∆∆CT)	1.0033	0.3433	0.9933	2.74	1.2333
PYL6	0.97942	0.594604	0.528509	3.75809	0.539614	SE	0.01453	0.02963	0.01856	0.12583	0.01155		PYL6	0.97942	0.332171	0.961483	2.88786	1.30134	SE	0.01453	0.00667	0.01764	0.07937	0.08743
PYL6	1.00347	0.619854	0.521233	4.11246	0.521233	P value		0.000203195	2.81688e-05	2.42038e-05	1.50188e-05		PYL6	1.00347	0.348686	1.00231	2.71321	1.06437	P value		1.57067e-06	0.746856	2.60418e-05	0.0565518
								**	**	**	**										**		**
						PYL7	0H	3H	6H	12H	24H								PYL7	0H	3H	6H	12H	24H
PYL7	0.843816	1	0.668964	7.94474	0.403321	Average (2-∆∆CT)	1.0067	1.3933	0.8267	8.7633	0.3567		PYL7	0.843816	0.806642	1.94981	6.54322	2.15846	Average (2-∆∆CT)	1.0067	0.9433	1.8033	5.8733	1.7733
PYL7	1.03526	1.72907	0.933033	9.78112	0.381565	SE	0.08819	0.21263	0.07965	0.53989	0.03383		PYL7	1.03526	0.864537	1.89649	5.54044	1.16473	SE	0.08819	0.10929	0.12252	0.33333	0.31013
PYL7	1.14076	1.45397	0.876606	8.57419	0.291183	P value		0.166607	0.201995	0.000142061	0.00227166		PYL7	1.14076	1.15669	1.56193	5.54044	2	P value		0.668907	0.00595427	0.000147042	0.0745702
										**	**												**
						PYL8	0H	3H	6H	12H	24H								PYL8	0H	3H	6H	12H	24H
PYL8	0.920188	4.34694	10.9283	36.0019	0.790041	Average (2-∆∆CT)	1	5.13	13.3133	34.3233	0.8067		PYL8	0.920188	2.63902	35.0984	24.761	18.8959	Average (2-∆∆CT)	1	3.27	36.32	24.26	16.8167
PYL8	1.04608	4.89056	16.7955	32.6724	0.768438	SE	0.04041	0.53329	1.78206	0.96136	0.02728		PYL8	1.04608	4.19887	40.8803	24.761	14.5203	SE	0.04041	0.47466	2.36071	0.5	1.26889
PYL8	1.03168	6.1475	12.2101	34.2968	0.858565	P value		0.00151389	0.0022992	4.14474e-06	0.0158711		PYL8	1.03168	2.96905	32.9757	23.2636	17.0299	P value		0.00886942	0.000116575	1.28422e-06	0.000237817
								**	**	**	*										**	**	**	**
						PYL9	0H	3H	6H	12H	24H								PYL9	0H	3H	6H	12H	24H
PYL9	1.04972	3.20428	2.28153	3.18215	1.46409	Average (2-∆∆CT)	1.0033	2.74	2.5133	3.4867	1.4033		PYL9	1.04972	1.30134	2.95536	2.60268	5.9794	Average (2-∆∆CT)	1.0033	1.8533	3.0767	2.82	6.2667
PYL9	1.06807	2.78949	2.69447	4.22807	1.70527	SE	0.05696	0.28113	0.1217	0.37356	0.19548		PYL9	1.06807	2.25012	3.66378	2.92817	6.58873	SE	0.05696	0.28521	0.30867	0.11	0.17704
PYL9	0.885768	2.23457	2.56685	3.05252	1.04247	P value		0.00371597	0.000362155	0.00272774	0.117156		PYL9	0.885768	2.01391	2.6087	2.92817	6.23332	P value		0.0426184	0.00277905	0.000121851	9.25564e-06
								**	**	**											*	**	**	**
						PYL10	0H	3H	6H	12H	24H								PYL10	0H	3H	6H	12H	24H
PYL10	0.926588	1.51572	4.53154	7.4127	1.12506	Average (2-∆∆CT)	1.0067	1.7033	4.0333	9.1633	1.3633		PYL10	0.926588	1.52626	4.63746	7.51618	4.28709	Average (2-∆∆CT)	1.0067	1.49	4.8	8.07	4.19
PYL10	0.976032	1.79005	4.75683	9.44794	1.58008	SE	0.05364	0.09171	0.61526	0.94052	0.13017		PYL10	0.976032	1.33793	4.60542	7.94474	3.81055	SE	0.05364	0.07767	0.17521	0.36097	0.19698
PYL10	1.10957	1.8025	2.80889	10.6295	1.37554	P value		0.00297927	0.00802578	0.000973617	0.0667782		PYL10	1.10957	1.60214	5.14558	8.75435	4.46915	P value		0.00715132	3.22479e-05	4.29029e-05	9.79449e-05
								**	**	**											**	**	**	**
						PYL11	0H	3H	6H	12H	24H								PYL11	0H	3H	6H	12H	24H
PYL11	1.08673	0.466516	0.607097	0.432269	1.07923	Average (2-∆∆CT)	1.0067	0.3367	0.5667	0.4233	1.0267		PYL11	1.08673	0.870551	0.670511	0.817902	1.61328	Average (2-∆∆CT)	1.0067	0.88	0.6233	0.7933	1.8167
PYL11	0.832199	0.291183	0.562529	0.426317	1.03526	SE	0.08838	0.06766	0.02333	0.00667	0.03528		PYL11	0.832199	0.946058	0.570382	0.607097	1.86607	SE	0.08838	0.03786	0.02906	0.09905	0.10729
PYL11	1.09809	0.25	0.532185	0.408951	0.959264	P value		0.00359015	0.00804863	0.0025867	0.84976		PYL11	1.09809	0.823591	0.632878	0.946058	1.97247	P value		0.251753	0.0141313	0.176943	0.00411218
								**	**	**												*		**
						PYL12	0H	3H	6H	12H	24H								PYL12	0H	3H	6H	12H	24H
PYL12	0.993092	0.920188	2.31338	4.37717	1.45397	Average (2-∆∆CT)	0.9967	0.9867	2.8967	3.9433	1.2767		PYL12	0.993092	1.68179	2.13366	4.82323	3.89062	Average (2-∆∆CT)	0.9967	1.68	2.6	5.2567	4.08
PYL12	0.97942	1.10957	3.43426	3.4822	1.34723	SE	0.01202	0.06173	0.32441	0.26015	0.12667		PYL12	0.97942	1.93187	2.16345	5.77572	3.45815	SE	0.01202	0.14434	0.45508	0.2805	0.4236
PYL12	1.02456	0.933033	2.94854	3.97237	1.02811	P value		0.863921	0.0042625	0.000341671	0.0972392		PYL12	1.02456	1.43396	3.51453	5.16941	4.89056	P value		0.00907112	0.024395	0.000107101	0.00191227
									**	**											**	*	**	**
						PYL13	0H	3H	6H	12H	24H								PYL13	0H	3H	6H	12H	24H
PYL13	0.773782	0.574349	0.795536	1.1487	3.18215	Average (2-∆∆CT)	1.0167	0.59	0.8	1.8767	2.68		PYL13	0.773782	2.2974	1.60585	4.99332	8.28212	Average (2-∆∆CT)	1.0167	2.4167	1.6633	4.0567	7.69
PYL13	1.04972	0.479632	0.687771	2.23457	2.07053	SE	0.13383	0.07	0.06351	0.36338	0.32512		PYL13	1.04972	2.78949	1.39797	4.05584	7.78124	SE	0.13383	0.19099	0.16954	0.53983	0.36937
PYL13	1.23114	0.721965	0.913831	2.25012	2.78949	P value		0.0472468	0.213075	0.091114	0.0091134		PYL13	1.23114	2.15846	1.97703	3.11666	7.01285	P value		0.00389881	0.0406619	0.00552668	7.00338e-05
								*			**										**	*	**	**
						PYL14	0H	3H	6H	12H	24H								PYL14	0H	3H	6H	12H	24H
PYL14	0.95705	1.03526	0.965936	0.784584	0.5	Average (2-∆∆CT)	1	1.1433	0.9967	0.8033	0.44		PYL14	0.91	0.858565	1.11987	0.726986	0.76313	Average (2-∆∆CT)	1	0.8733	1.0967	0.7267	0.7033
PYL14	1.05093	1.18099	0.840896	0.570382	0.444421	SE	0.02646	0.05239	0.09905	0.14193	0.03464		PYL14	0.82	0.823591	1.23399	0.707107	0.737135	SE	0.02646	0.03528	0.08452	0.00882	0.04702
PYL14	0.99424	1.21419	1.18099	1.06437	0.376312	P value		0.0805663	0.965075	0.252961	0.000238765		PYL14	0.98	0.939523	0.941696	0.737135	0.61132	P value		0.636457	0.114076	0.018945	0.0388848
											**												*	*
T3	2-∆∆CT value					T3							T4	2-∆∆CT value					T4
	0H	3H	6H	12H	24H	PYL1	0H	3H	6H	12H	24H			0H	3H	6H	12H	24H	PYL1	0H	3H	6H	12H	24H
PYL1	0.757858	2.67586	3.27161	4.69134	1.98618	Average (2-∆∆CT)	1.0633	2.5733	3.65	3.93	1.8433		PYL1	0.757858	8.22491	14.6213	5.35171	5.24157	Average (2-∆∆CT)	1.0633	8.61	12.8533	6.1267	5.5933
PYL1	1.61888	3.05252	3.4822	3.07375	1.95884	SE	0.27871	0.31061	0.2816	0.47032	0.13195		PYL1	1.61888	10.1965	12.4666	6.10504	6.19026	SE	0.27871	0.82867	0.92931	0.4533	0.30002
PYL1	0.812252	1.98618	4.19887	4.02782	1.58008	P value		0.0226309	0.00281433	0.00627727	0.0646085		PYL1	0.812252	7.4127	11.4716	6.9163	5.35171	P value		0.000980352	0.000263267	0.00067474	0.000377248
								*	**	**											**	**	**	**
						PYL2	0H	3H	6H	12H	24H								PYL2	0H	3H	6H	12H	24H
PYL2	1.65864	1.95884	2.54912	3.4822	1.61328	Average (2-∆∆CT)	1.0733	1.9333	2.5633	3.2667	1.45		PYL2	1.65864	7.83536	8.1681	5.35171	3.43426	Average (2-∆∆CT)	1.0733	6.87	8.98	5.01	3.84
PYL2	0.82645	2.01391	2.39496	3.13834	1.19748	SE	0.29475	0.05364	0.10414	0.10729	0.12662		PYL2	0.82645	7.46426	7.06162	4.85678	4.05584	SE	0.29475	0.78768	1.40211	0.17039	0.20518
PYL2	0.734584	1.82766	2.75108	3.18215	1.53688	P value		0.0451685	0.00871378	0.00218339	0.305813		PYL2	0.734584	5.31474	11.7127	4.82323	4.02782	P value		0.00229849	0.00526827	0.000317491	0.00149518
								*	**	**											**	**	**	**
						PYL3	0H	3H	6H	12H	24H								PYL3	0H	3H	6H	12H	24H
PYL3	0.99654	1.67018	2.37841	0.965936	1.70527	Average (2-∆∆CT)	1.0033	1.7867	2.5333	0.9767	1.8967		PYL3	0.99654	5.77572	5.9794	2.23457	2.28153	Average (2-∆∆CT)	1.0033	5.89	5.9733	2.01	2.4
PYL3	1.04972	1.7411	2.60268	0.986233	1.86607	SE	0.02603	0.08413	0.07688	0.00667	0.11624		PYL3	1.04972	6.1475	5.65685	2.26577	2.23457	SE	0.02603	0.13051	0.17901	0.24028	0.14572
PYL3	0.959264	1.94531	2.62079	0.965936	2.11404	P value		0.000824307	4.88879e-05	0.342862	0.00183725		PYL3	0.959264	5.73582	6.27667	1.52626	2.69447	P value		3.35e-06	0.00170013	0.0143072	0.0142682
								**	**		**										**	**	*	*
						PYL4	0H	3H	6H	12H	24H								PYL4	0H	3H	6H	12H	24H
PYL4	0.947151	0.423373	0.582367	1.76541	0.503478	Average (2-∆∆CT)	1.01	0.5367	0.6767	1.98	0.65		PYL4	0.947151	1.20581	1.03526	1.7411	0.351111	Average (2-∆∆CT)	1.01	1.0567	0.8633	1.96	0.5167
PYL4	1.2072	0.539614	0.784584	2.01391	0.692555	SE	0.10263	0.06642	0.05783	0.11358	0.07767		PYL4	1.2072	0.959264	0.687771	1.84038	0.602904	SE	0.10263	0.07753	0.10105	0.17243	0.08333
PYL4	0.874583	0.646176	0.668964	2.15846	0.76313	P value		0.0167801	0.0363367	0.0252815	0.10302		PYL4	0.874583	1	0.864537	2.2974	0.598739	P value		0.738057	0.359712	0.00879189	0.0197741
								*	*	*													**	*
						PYL5	0H	3H	6H	12H	24H								PYL5	0H	3H	6H	12H	24H
PYL5	0.97942	1.82766	4.53154	9.91766	1.07923	Average (2-∆∆CT)	1	1.6333	4.5033	9.1067	1.1067		PYL5	0.97942	3.83706	2.63902	12.8171	2.11404	Average (2-∆∆CT)	1	3.94	3.6633	13.8567	2.5233
PYL5	0.96929	1.65864	4.25748	8.9383	1.16473	SE	0.02517	0.12197	0.13346	0.42963	0.02667		PYL5	0.96929	4.16986	4.02782	14.0257	2.51403	SE	0.02517	0.11533	0.51847	0.55529	0.24258
PYL5	1.04608	1.41421	4.72397	8.45614	1.07923	P value		0.00656275	1.40392e-05	4.69138e-05	0.145729		PYL5	1.04608	3.81055	4.31691	14.723	2.94854	P value		1.5432e-05	0.00680785	2.09127e-05	0.00323197
								**	**	**											**	**	**	**
						PYL6	0H	3H	6H	12H	24H								PYL6	0H	3H	6H	12H	24H
PYL6	1.02811	0.327598	0.659754	2.25012	0.598739	Average (2-∆∆CT)	1.0033	0.3233	0.7067	2.1	0.7033		PYL6	1.02811	0.721965	0.68302	2.75108	0.946058	Average (2-∆∆CT)	1.0033	0.62	0.6967	2.5433	0.9767
PYL6	0.97942	0.291183	0.707107	2.17347	0.737135	SE	0.01453	0.01764	0.02603	0.1124	0.05239		PYL6	0.97942	0.554785	0.779165	2.67586	0.933033	SE	0.01453	0.05132	0.0441	0.17285	0.03712
PYL6	1.00347	0.346277	0.747425	1.87905	0.768438	P value		5.8125e-06	0.0134672	0.0100999	0.0415502		PYL6	1.00347	0.590496	0.628507	2.20381	1.04972	P value		0.00963833	0.029565	0.000858	0.526087
								**	*	*	*										**	*	**
						PYL7	0H	3H	6H	12H	24H								PYL7	0H	3H	6H	12H	24H
PYL7	0.843816	0.876606	2.05623	3.81055	0.607097	Average (2-∆∆CT)	1.0067	1.18	1.9633	4.22	0.61		PYL7	0.843816	2.42839	3.41054	10.4831	1.06437	Average (2-∆∆CT)	1.0067	2.1633	2.8967	10.8833	1.18
PYL7	1.03526	0.993092	2.01391	3.86375	0.712025	SE	0.08819	0.24705	0.07311	0.38527	0.05774		PYL7	1.03526	1.91853	2.82843	10.7779	1.22264	SE	0.08819	0.14769	0.27913	0.26773	0.0611
PYL7	1.14076	1.67018	1.81504	4.99332	0.510506	P value		0.544717	0.0255893	0.00124277	0.0192157		PYL7	1.14076	2.14355	2.44528	11.3924	1.25701	P value		0.00250217	0.00301289	3.94081e-06	0.172152
									*	**	*										**	**	**
						PYL8	0H	3H	6H	12H	24H								PYL8	0H	3H	6H	12H	24H
PYL8	0.920188	2.49666	26.7228	23.4254	6.9644	Average (2-∆∆CT)	1	2.4733	24.43	24.06	6.5167		PYL8	0.920188	5.81589	12.5533	56.493	1.21419	Average (2-∆∆CT)	1	5.6867	11.6867	53.9733	1.15
PYL8	1.04608	2.17347	25.4572	25.8125	5.85634	SE	0.04041	0.16796	1.69938	0.88636	0.33498		PYL8	1.04608	5.61778	9.78112	51.9842	1.17283	SE	0.04041	0.06667	0.95475	1.32796	0.04163
PYL8	1.03168	2.75108	21.1121	22.9433	6.72717	P value		0.00101273	0.000160386	1.30587e-05	8.36295e-05		PYL8	1.03168	5.61778	12.7286	53.4456	1.07177	P value		4.3935e-07	0.000363539	2.36497e-06	0.0572569
								**	**	**	**										**	**	**
						PYL9	0H	3H	6H	12H	24H								PYL9	0H	3H	6H	12H	24H
PYL9	1.04972	0.80107	2.23457	2.15846	2.90795	Average (2-∆∆CT)	1.0033	0.9767	2.22	2.4667	3.1667		PYL9	1.04972	2.44528	5.73582	3.5801	1.45397	Average (2-∆∆CT)	1.0033	2.4567	4.7633	3.9267	1.6067
PYL9	1.06807	1.06437	2.49666	2.60268	2.90795	SE	0.05696	0.08838	0.16462	0.15377	0.25667		PYL9	1.06807	2.73208	4.19887	4.43828	1.65864	SE	0.05696	0.15592	0.49025	0.26187	0.07965
PYL9	0.885768	1.07177	1.93187	2.63902	3.68075	P value		0.845273	0.00829445	0.000887675	0.0012067		PYL9	0.885768	2.18859	4.34694	3.75809	1.70527	P value		0.0009652	0.00158716	0.000399605	0.00330929
									**	**	**										**	**	**	**
						PYL10	0H	3H	6H	12H	24H								PYL10	0H	3H	6H	12H	24H
PYL10	0.926588	1.86607	2.67586	10.5561	1.36604	Average (2-∆∆CT)	1.0067	1.5133	3.4567	10.0833	1.2467		PYL10	0.926588	1.85318	8.63383	10.1965	1.05702	Average (2-∆∆CT)	1.0067	1.8067	8.72	10.32	0.91
PYL10	0.976032	1.44393	4.11246	8.22491	1.43396	SE	0.05364	0.18836	0.41739	0.96799	0.15431		PYL10	0.976032	1.89212	9.25351	10.0561	0.870551	SE	0.05364	0.06438	0.28361	0.19425	0.07767
PYL10	1.10957	1.23114	3.5801	11.4716	0.939523	P value		0.0587111	0.00439814	0.000719665	0.213641		PYL10	1.10957	1.68179	8.28212	10.7034	0.795536	P value		0.000681642	1.17056e-05	1.3774e-06	0.367897
									**	**											**	**	**
						PYL11	0H	3H	6H	12H	24H								PYL11	0H	3H	6H	12H	24H
PYL11	1.08673	0.63728	0.20733	0.959264	1.60214	Average (2-∆∆CT)	1.0067	0.71	0.24	1.1433	1.6367		PYL11	1.08673	0.547147	0.752623	0.408951	0.456916	Average (2-∆∆CT)	1.0067	0.5433	0.5667	0.42	0.5067
PYL11	0.832199	0.476319	0.312083	1.16473	2.05623	SE	0.08838	0.15695	0.03512	0.10138	0.23454		PYL11	0.832199	0.532185	0.48971	0.378929	0.469761	SE	0.08838	0.00667	0.09207	0.02646	0.04177
PYL11	1.09809	1.00696	0.198884	1.31039	1.24833	P value		0.171234	0.00123895	0.35723	0.0649732		PYL11	1.09809	0.554785	0.460094	0.466516	0.586417	P value		0.00610681	0.0261681	0.00290583	0.00643766
								*	**												**	*	**	**
						PYL12	0H	3H	6H	12H	24H								PYL12	0H	3H	6H	12H	24H
PYL12	0.993092	4.50023	6.27667	1.05702	0.539614	Average (2-∆∆CT)	0.9967	4.6267	6.0167	1.02	0.68		PYL12	0.993092	1.31039	3.68075	2.31338	0.876606	Average (2-∆∆CT)	0.9967	1.73	3.6333	2.4367	0.8467
PYL12	0.97942	5.24157	6.1475	0.993092	0.570382	SE	0.01202	0.3238	0.20185	0.02082	0.1253		PYL12	0.97942	1.7411	3.75809	2.77022	0.933033	SE	0.01202	0.23965	0.08969	0.16826	0.06009
PYL12	1.02456	4.14106	5.61778	1.00696	0.933033	P value		0.000363198	1.56317e-05	0.443946	0.108021		PYL12	1.02456	2.14355	3.45815	2.23457	0.726986	P value		0.0383652	0.001534	0.00100507	0.0712334
								**	**												*	**	**
						PYL13	0H	3H	6H	12H	24H								PYL13	0H	3H	6H	12H	24H
PYL13	0.773782	1.72907	1.97247	3.27161	2.32947	Average (2-∆∆CT)	1.0167	1.5167	2.58	2.35	1.6367		PYL13	0.773782	1.69349	2.69447	2.69447	3.18215	Average (2-∆∆CT)	1.0167	1.9067	3.0133	3.3933	2.21
PYL13	1.04972	1.89212	2.04202	1.28343	1.27456	SE	0.13383	0.29695	0.57535	0.57934	0.34686		PYL13	1.04972	1.52626	3.70635	3.41054	1.93187	SE	0.13383	0.30024	0.34863	0.40134	0.49923
PYL13	1.23114	0.933033	3.73213	2.49666	1.31039	P value		0.198588	0.0570599	0.0881972	0.1696		PYL13	1.23114	2.49666	2.63902	4.08405	1.51572	P value		0.0536743	0.00580705	0.00490719	0.0829249
																						**	**
						PYL14	0H	3H	6H	12H	24H								PYL14	0H	3H	6H	12H	24H
PYL14	0.95705	0.628507	1.46409	1.23114	1.27456	Average (2-∆∆CT)	1	0.6633	1.5	1.3233	1.3067		PYL14	0.95705	0.835088	1.28343	0.840896	0.747425	Average (2-∆∆CT)	1	0.9933	1.5833	0.9333	0.8533
PYL14	1.05093	0.655197	1.43396	1.27456	1.29235	SE	0.02646	0.02028	0.05568	0.07424	0.02728		PYL14	1.05093	0.888843	1.55833	1.00696	0.784584	SE	0.02646	0.12914	0.18224	0.04978	0.08876
PYL14	0.99424	0.702222	1.61328	1.47427	1.3566	P value		0.00794297	0.0178699	0.0149728	0.0129555		PYL14	0.99424	1.24833	1.90528	0.946058	1.02811	P value		0.943565	0.0330232	0.280214	0.185064
								**	*	*	*											*
